# Supplementary material
Source: PubMed Central journal article supplement (PMC8591992)
Supplement: NIHMS1637265-supplement-Supp_Data.pdf [file NIHMS1637265-supplement-Supp_Data.pdf]

| number | ensembl  | symbol    | PreB_shPhf | PreB_shPhf | PreB_shPhf | PreB_shPhf | PreB_shPhf | PreB_shPhf |
|--------|----------|-----------|------------|------------|------------|------------|------------|------------|
| 1      | ENSMUSG0 | Lad1      | 35.97407   | 1.856872   | 0.319922   | 5.804137   | 6.47E-09   | 1.25E-06   |
| 2      | ENSMUSG0 | Synpo2    | 17.74504   | 1.730236   | 0.455821   | 3.795864   | 0.000147   | 0.006414   |
| 3      | ENSMUSG0 | Ar        | 11.61822   | 1.692028   | 0.521501   | 3.244531   | 0.001176   | 0.030625   |
| 4      | ENSMUSG0 | Cx3cl1    | 25.33334   | 1.53391    | 0.383221   | 4.002681   | 6.26E-05   | 0.003336   |
| 5      | ENSMUSG0 | Fscn1     | 261.4503   | 1.491355   | 0.158098   | 9.433104   | 3.98E-21   | 3.41E-18   |
| 6      | ENSMUSG0 | Ccl22     | 196.2006   | 1.433608   | 0.142771   | 10.04134   | 1.00E-23   | 1.01E-20   |
| 7      | ENSMUSG0 | Bcl2a1d   | 63.73692   | 1.22958    | 0.225234   | 5.459126   | 4.78E-08   | 7.74E-06   |
| 8      | ENSMUSG0 | Apo17c    | 131.9181   | 1.20091    | 0.163221   | 7.357558   | 1.87E-13   | 7.65E-11   |
| 9      | ENSMUSG0 | Bcl2a1a   | 52.03656   | 1.193726   | 0.248954   | 4.794961   | 1.63E-06   | 0.000166   |
| 10     | ENSMUSG0 | Cacnb3    | 74.76255   | 1.118542   | 0.230551   | 4.8516     | 1.22E-06   | 0.000133   |
| 11     | ENSMUSG0 | Dlk1      | 32.88949   | 1.115417   | 0.295882   | 3.769799   | 0.000163   | 0.006987   |
| 12     | ENSMUSG0 | Nr4a3     | 33.72462   | 1.104394   | 0.317014   | 3.483744   | 0.000494   | 0.016566   |
| 13     | ENSMUSG0 | Flt3      | 45.5471    | 1.061792   | 0.260277   | 4.079462   | 4.51E-05   | 0.002598   |
| 14     | ENSMUSG0 | Pdgfa     | 28.49729   | 1.051826   | 0.31877    | 3.299637   | 0.000968   | 0.026528   |
| 15     | ENSMUSG0 | Hnrnp1l   | 91.35156   | -1.01053   | 0.197949   | -5.10502   | 3.31E-07   | 4.17E-05   |
| 16     | ENSMUSG0 | Lilr4b    | 128.2149   | -1.01088   | 0.196049   | -5.15628   | 2.52E-07   | 3.29E-05   |
| 17     | ENSMUSG0 | Nfe2      | 31.69355   | -1.01443   | 0.312151   | -3.24981   | 0.001155   | 0.030208   |
| 18     | ENSMUSG0 | Slc16a3   | 43.75615   | -1.02759   | 0.264613   | -3.88339   | 0.000103   | 0.004863   |
| 19     | ENSMUSG0 | Selenbp1  | 48.16983   | -1.02813   | 0.250975   | -4.09655   | 4.19E-05   | 0.002455   |
| 20     | ENSMUSG0 | S100a9    | 134.8359   | -1.03121   | 0.222692   | -4.63066   | 3.65E-06   | 0.00033    |
| 21     | ENSMUSG0 | Cebp d    | 43.95819   | -1.04022   | 0.267862   | -3.88341   | 0.000103   | 0.004863   |
| 22     | ENSMUSG0 | Aldoc     | 34.66731   | -1.04275   | 0.325731   | -3.20126   | 0.001368   | 0.034116   |
| 23     | ENSMUSG0 | C1ra      | 29.4857    | -1.05123   | 0.311837   | -3.37107   | 0.000749   | 0.022261   |
| 24     | ENSMUSG0 | Phf23     | 935.7533   | -1.05912   | 0.075059   | -14.1105   | 3.27E-45   | 1.40E-41   |
| 25     | ENSMUSG0 | Mboat1    | 36.50535   | -1.06169   | 0.282634   | -3.75642   | 0.000172   | 0.007282   |
| 26     | ENSMUSG0 | B4galt6   | 81.70657   | -1.06403   | 0.195605   | -5.43969   | 5.34E-08   | 8.56E-06   |
| 27     | ENSMUSG0 | Smox      | 22.82643   | -1.07228   | 0.351857   | -3.0475    | 0.002308   | 0.049665   |
| 28     | ENSMUSG0 | Tyropb    | 132.7271   | -1.07385   | 0.179562   | -5.9804    | 2.23E-09   | 4.66E-07   |
| 29     | ENSMUSG0 | Anxa2     | 96.77853   | -1.08266   | 0.176668   | -6.12823   | 8.89E-10   | 2.01E-07   |
| 30     | ENSMUSG0 | Gm15448   | 41.25006   | -1.09265   | 0.265372   | -4.1174    | 3.83E-05   | 0.002288   |
| 31     | ENSMUSG0 | Clec4e    | 70.00787   | -1.10308   | 0.229638   | -4.80354   | 1.56E-06   | 0.000161   |
| 32     | ENSMUSG0 | Adgre1    | 48.15183   | -1.10741   | 0.249073   | -4.44615   | 8.74E-06   | 0.000711   |
| 33     | ENSMUSG0 | Rarg      | 22.16757   | -1.10803   | 0.363671   | -3.04678   | 0.002313   | 0.049722   |
| 34     | ENSMUSG0 | Ms4a6c    | 108.2238   | -1.11224   | 0.177792   | -6.25583   | 3.95E-10   | 9.55E-08   |
| 35     | ENSMUSG0 | Ly6c2     | 777.2589   | -1.12286   | 0.21469    | -5.23014   | 1.69E-07   | 2.25E-05   |
| 36     | ENSMUSG0 | Farp2     | 32.18319   | -1.12466   | 0.303883   | -3.70095   | 0.000215   | 0.00869    |
| 37     | ENSMUSG0 | Pira11    | 69.82431   | -1.12489   | 0.210953   | -5.33242   | 9.69E-08   | 1.45E-05   |
| 38     | ENSMUSG0 | Chil4     | 22.27234   | -1.14597   | 0.356657   | -3.21308   | 0.001313   | 0.032981   |
| 39     | ENSMUSG0 | Ccl9      | 47.42326   | -1.15059   | 0.244039   | -4.71476   | 2.42E-06   | 0.000232   |
| 40     | ENSMUSG0 | Smpdl3b   | 90.36077   | -1.15274   | 0.19615    | -5.87684   | 4.18E-09   | 8.36E-07   |
| 41     | ENSMUSG0 | I830127L0 | 78.62282   | -1.15853   | 0.255059   | -4.54221   | 5.57E-06   | 0.000484   |
| 42     | ENSMUSG0 | Igsf6     | 121.5088   | -1.16362   | 0.170347   | -6.83092   | 8.44E-12   | 2.78E-09   |
| 43     | ENSMUSG0 | Acpp      | 46.26145   | -1.16725   | 0.269367   | -4.3333    | 1.47E-05   | 0.00105    |
| 44     | ENSMUSG0 | Rab32     | 119.3568   | -1.17475   | 0.164221   | -7.15347   | 8.46E-13   | 3.23E-10   |
| 45     | ENSMUSG0 | Fas       | 30.78374   | -1.17598   | 0.303049   | -3.8805    | 0.000104   | 0.004899   |
| 46     | ENSMUSG0 | Gatm      | 53.22035   | -1.1811    | 0.27696    | -4.26451   | 2.00E-05   | 0.001358   |
| 47     | ENSMUSG0 | Sort1     | 180.8099   | -1.18146   | 0.14425    | -8.19038   | 2.60E-16   | 1.31E-13   |

|    |                   |          |          |          |          |          |          |
|----|-------------------|----------|----------|----------|----------|----------|----------|
| 48 | ENSMUSG0 Clec4a1  | 27.48034 | -1.18281 | 0.313245 | -3.776   | 0.000159 | 0.006834 |
| 49 | ENSMUSG0 Tlr2     | 196.484  | -1.19516 | 0.142392 | -8.39344 | 4.72E-17 | 2.70E-14 |
| 50 | ENSMUSG0 Clec4d   | 52.98731 | -1.20429 | 0.280385 | -4.29512 | 1.75E-05 | 0.001213 |
| 51 | ENSMUSG0 Smpdl3a  | 152.2445 | -1.20509 | 0.151625 | -7.94783 | 1.90E-15 | 8.80E-13 |
| 52 | ENSMUSG0 Clec5a   | 45.61454 | -1.20834 | 0.286843 | -4.21255 | 2.53E-05 | 0.001672 |
| 53 | ENSMUSG0 Lilrb4a  | 53.58348 | -1.21102 | 0.246793 | -4.90704 | 9.25E-07 | 0.000104 |
| 54 | ENSMUSG0 H19      | 149.42   | -1.21752 | 0.143792 | -8.46726 | 2.51E-17 | 1.49E-14 |
| 55 | ENSMUSG0 Fcer1g   | 146.7342 | -1.2186  | 0.180749 | -6.74198 | 1.56E-11 | 4.96E-09 |
| 56 | ENSMUSG0 Selenbp2 | 26.41905 | -1.22343 | 0.34584  | -3.53757 | 0.000404 | 0.014235 |
| 57 | ENSMUSG0 Rab3il1  | 18.55481 | -1.23882 | 0.386285 | -3.207   | 0.001341 | 0.033638 |
| 58 | ENSMUSG0 Ifi207   | 137.7961 | -1.24505 | 0.169443 | -7.3479  | 2.01E-13 | 8.03E-11 |
| 59 | ENSMUSG0 Pirb     | 158.497  | -1.24568 | 0.151101 | -8.24404 | 1.66E-16 | 8.92E-14 |
| 60 | ENSMUSG0 Sirpa    | 306.1728 | -1.26475 | 0.115184 | -10.9803 | 4.75E-28 | 5.83E-25 |
| 61 | ENSMUSG0 Tnfaip2  | 187.1315 | -1.27133 | 0.14195  | -8.95615 | 3.36E-19 | 2.14E-16 |
| 62 | ENSMUSG0 Pira6    | 40.18598 | -1.27596 | 0.267653 | -4.76723 | 1.87E-06 | 0.000185 |
| 63 | ENSMUSG0 Cebpa    | 49.20923 | -1.27683 | 0.260638 | -4.89888 | 9.64E-07 | 0.000108 |
| 64 | ENSMUSG0 Ugt1a7c  | 46.66268 | -1.27865 | 0.266596 | -4.79619 | 1.62E-06 | 0.000166 |
| 65 | ENSMUSG0 Cebpb    | 89.46261 | -1.28073 | 0.22238  | -5.75919 | 8.45E-09 | 1.61E-06 |
| 66 | ENSMUSG0 Shtn1    | 35.3268  | -1.28463 | 0.318148 | -4.03782 | 5.40E-05 | 0.003015 |
| 67 | ENSMUSG0 Pla2g7   | 92.70285 | -1.288   | 0.240284 | -5.36031 | 8.31E-08 | 1.27E-05 |
| 68 | ENSMUSG0 Pilra    | 46.14025 | -1.29277 | 0.251068 | -5.14907 | 2.62E-07 | 3.38E-05 |
| 69 | ENSMUSG0 Pygl     | 76.47214 | -1.30623 | 0.208716 | -6.25842 | 3.89E-10 | 9.53E-08 |
| 70 | ENSMUSG0 Peli2    | 26.32352 | -1.30895 | 0.342603 | -3.82062 | 0.000133 | 0.005916 |
| 71 | ENSMUSG0 Mcf2l    | 31.69283 | -1.30902 | 0.31628  | -4.13879 | 3.49E-05 | 0.002139 |
| 72 | ENSMUSG0 Stab1    | 35.39062 | -1.31581 | 0.301147 | -4.36934 | 1.25E-05 | 0.000921 |
| 73 | ENSMUSG0 Atp11a   | 122.9811 | -1.31877 | 0.179819 | -7.33387 | 2.24E-13 | 8.72E-11 |
| 74 | ENSMUSG0 Ppfia4   | 15.37031 | -1.31995 | 0.412842 | -3.19723 | 0.001388 | 0.034346 |
| 75 | ENSMUSG0 Cd302    | 41.36736 | -1.3214  | 0.276609 | -4.77715 | 1.78E-06 | 0.000178 |
| 76 | ENSMUSG0 App      | 198.7957 | -1.32839 | 0.139481 | -9.52378 | 1.67E-21 | 1.51E-18 |
| 77 | ENSMUSG0 Tfec     | 41.64206 | -1.33115 | 0.266376 | -4.99726 | 5.82E-07 | 6.93E-05 |
| 78 | ENSMUSG0 Met      | 52.54236 | -1.33182 | 0.254225 | -5.23876 | 1.62E-07 | 2.17E-05 |
| 79 | ENSMUSG0 Ppm1h    | 46.05425 | -1.33772 | 0.251783 | -5.31299 | 1.08E-07 | 1.59E-05 |
| 80 | ENSMUSG0 Prtn3    | 110.9063 | -1.34707 | 0.182688 | -7.37362 | 1.66E-13 | 6.95E-11 |
| 81 | ENSMUSG0 Csf3r    | 54.84652 | -1.3474  | 0.229286 | -5.8765  | 4.19E-09 | 8.36E-07 |
| 82 | ENSMUSG0 Lilra6   | 42.25014 | -1.34935 | 0.28204  | -4.78427 | 1.72E-06 | 0.000173 |
| 83 | ENSMUSG0 Rbm47    | 22.55384 | -1.34973 | 0.363374 | -3.71444 | 0.000204 | 0.008318 |
| 84 | ENSMUSG0 Gm10693  | 25.10938 | -1.36251 | 0.373418 | -3.64874 | 0.000264 | 0.010322 |
| 85 | ENSMUSG0 Fgd4     | 34.13429 | -1.36356 | 0.287731 | -4.739   | 2.15E-06 | 0.000208 |
| 86 | ENSMUSG0 Rnf128   | 19.98735 | -1.37369 | 0.39429  | -3.48396 | 0.000494 | 0.016566 |
| 87 | ENSMUSG0 Myo1f    | 165.151  | -1.39105 | 0.147584 | -9.42552 | 4.28E-21 | 3.50E-18 |
| 88 | ENSMUSG0 Nfam1    | 139.0939 | -1.39755 | 0.146543 | -9.53676 | 1.47E-21 | 1.40E-18 |
| 89 | ENSMUSG0 Alox5ap  | 92.4761  | -1.40648 | 0.197781 | -7.11131 | 1.15E-12 | 4.20E-10 |
| 90 | ENSMUSG0 Ccr1     | 22.73947 | -1.42717 | 0.37238  | -3.83257 | 0.000127 | 0.005709 |
| 91 | ENSMUSG0 Aoah     | 65.89417 | -1.44116 | 0.223681 | -6.44292 | 1.17E-10 | 3.22E-08 |
| 92 | ENSMUSG0 Sgms2    | 31.68132 | -1.46228 | 0.323909 | -4.51448 | 6.35E-06 | 0.000536 |
| 93 | ENSMUSG0 Chil3    | 127.854  | -1.46372 | 0.159093 | -9.20038 | 3.57E-20 | 2.35E-17 |
| 94 | ENSMUSG0 Cd300lf  | 16.80205 | -1.46641 | 0.422882 | -3.46766 | 0.000525 | 0.017225 |
| 95 | ENSMUSG0 F5       | 28.60887 | -1.47071 | 0.317635 | -4.63019 | 3.65E-06 | 0.00033  |

|     |                    |          |          |          |          |          |          |
|-----|--------------------|----------|----------|----------|----------|----------|----------|
| 96  | ENSMUSG0 Dmxl2     | 79.58256 | -1.4768  | 0.199685 | -7.39564 | 1.41E-13 | 6.04E-11 |
| 97  | ENSMUSG0 Plekhg1   | 38.22835 | -1.48204 | 0.281338 | -5.26784 | 1.38E-07 | 1.94E-05 |
| 98  | ENSMUSG0 Gpnmb     | 269.5729 | -1.49118 | 0.299704 | -4.97551 | 6.51E-07 | 7.70E-05 |
| 99  | ENSMUSG0 Xdh       | 58.20532 | -1.50128 | 0.234793 | -6.39409 | 1.62E-10 | 4.26E-08 |
| 100 | ENSMUSG0 Fgr       | 36.5249  | -1.513   | 0.287517 | -5.2623  | 1.42E-07 | 1.98E-05 |
| 101 | ENSMUSG0 Cd300lb   | 20.69293 | -1.51469 | 0.375961 | -4.02885 | 5.61E-05 | 0.003092 |
| 102 | ENSMUSG0 Rin2      | 19.14453 | -1.52176 | 0.391038 | -3.89158 | 9.96E-05 | 0.004772 |
| 103 | ENSMUSG0 Hp        | 313.166  | -1.52825 | 0.128215 | -11.9194 | 9.37E-33 | 1.34E-29 |
| 104 | ENSMUSG0 Fpr2      | 48.75576 | -1.53677 | 0.271152 | -5.66753 | 1.45E-08 | 2.67E-06 |
| 105 | ENSMUSG0 Elane     | 26.88577 | -1.54112 | 0.326315 | -4.7228  | 2.33E-06 | 0.000224 |
| 106 | ENSMUSG0 Dram1     | 65.38566 | -1.55602 | 0.229642 | -6.77586 | 1.24E-11 | 4.00E-09 |
| 107 | ENSMUSG0 Thbs1     | 861.3335 | -1.56115 | 0.224844 | -6.94323 | 3.83E-12 | 1.31E-09 |
| 108 | ENSMUSG0 Abcd2     | 20.41217 | -1.56716 | 0.379042 | -4.13453 | 3.56E-05 | 0.002164 |
| 109 | ENSMUSG0 Hk3       | 32.77561 | -1.57001 | 0.299313 | -5.24537 | 1.56E-07 | 2.12E-05 |
| 110 | ENSMUSG0 Dock1     | 19.53639 | -1.5832  | 0.399179 | -3.96614 | 7.30E-05 | 0.003774 |
| 111 | ENSMUSG0 Lpl       | 65.03886 | -1.59736 | 0.247986 | -6.44134 | 1.18E-10 | 3.22E-08 |
| 112 | ENSMUSG0 Cd300a    | 25.76397 | -1.60846 | 0.364375 | -4.41429 | 1.01E-05 | 0.000801 |
| 113 | ENSMUSG0 Axl       | 68.85271 | -1.61177 | 0.235784 | -6.8358  | 8.15E-12 | 2.74E-09 |
| 114 | ENSMUSG0 Sh3pxd2b  | 54.86368 | -1.62732 | 0.249454 | -6.52353 | 6.87E-11 | 2.03E-08 |
| 115 | ENSMUSG0 Mtus1     | 73.72911 | -1.62837 | 0.228941 | -7.11261 | 1.14E-12 | 4.20E-10 |
| 116 | ENSMUSG0 Clec7a    | 23.476   | -1.63652 | 0.382932 | -4.27367 | 1.92E-05 | 0.001319 |
| 117 | ENSMUSG0 Apobr     | 20.53587 | -1.64115 | 0.393922 | -4.16618 | 3.10E-05 | 0.001975 |
| 118 | ENSMUSG0 Csf1r     | 291.1854 | -1.64216 | 0.143862 | -11.4149 | 3.53E-30 | 4.65E-27 |
| 119 | ENSMUSG0 Ltbr      | 42.75756 | -1.66737 | 0.270418 | -6.1659  | 7.01E-10 | 1.65E-07 |
| 120 | ENSMUSG0 F10       | 45.98173 | -1.66953 | 0.296785 | -5.62539 | 1.85E-08 | 3.28E-06 |
| 121 | ENSMUSG0 F630028O: | 20.37071 | -1.68436 | 0.384263 | -4.38336 | 1.17E-05 | 0.000883 |
| 122 | ENSMUSG0 Adgre4    | 25.10214 | -1.69427 | 0.360407 | -4.70098 | 2.59E-06 | 0.000244 |
| 123 | ENSMUSG0 Il1f9     | 16.1815  | -1.69847 | 0.483077 | -3.51593 | 0.000438 | 0.015217 |
| 124 | ENSMUSG0 Tnfrsf1a  | 77.88603 | -1.71876 | 0.206219 | -8.33464 | 7.77E-17 | 4.30E-14 |
| 125 | ENSMUSG0 C3        | 437.0583 | -1.80665 | 0.235111 | -7.68423 | 1.54E-14 | 6.77E-12 |
| 126 | ENSMUSG0 6430548M  | 12.7211  | -1.80772 | 0.497943 | -3.63038 | 0.000283 | 0.010914 |
| 127 | ENSMUSG0 Fn1       | 85.15714 | -1.82138 | 0.207515 | -8.77709 | 1.68E-18 | 1.03E-15 |
| 128 | ENSMUSG0 Olfm1     | 38.33338 | -1.83647 | 0.33782  | -5.43623 | 5.44E-08 | 8.56E-06 |
| 129 | ENSMUSG0 Ngp       | 87.88931 | -1.85249 | 0.224983 | -8.2339  | 1.81E-16 | 9.42E-14 |
| 130 | ENSMUSG0 Ltf       | 29.17978 | -1.86693 | 0.331706 | -5.62829 | 1.82E-08 | 3.28E-06 |
| 131 | ENSMUSG0 Lgals3    | 280.1533 | -1.88246 | 0.149786 | -12.5677 | 3.18E-36 | 5.45E-33 |
| 132 | ENSMUSG0 Mcemp1    | 27.70193 | -1.89532 | 0.334258 | -5.67024 | 1.43E-08 | 2.66E-06 |
| 133 | ENSMUSG0 Saa3      | 130.2223 | -1.89897 | 0.204879 | -9.26873 | 1.88E-20 | 1.40E-17 |
| 134 | ENSMUSG0 Tlr13     | 33.70653 | -1.93497 | 0.325195 | -5.95019 | 2.68E-09 | 5.54E-07 |
| 135 | ENSMUSG0 Gda       | 162.6217 | -1.94561 | 0.160491 | -12.1228 | 7.99E-34 | 1.25E-30 |
| 136 | ENSMUSG0 Lrp1      | 85.49609 | -1.95976 | 0.212833 | -9.20795 | 3.32E-20 | 2.28E-17 |
| 137 | ENSMUSG0 Ptger3    | 19.99641 | -1.96873 | 0.404502 | -4.86706 | 1.13E-06 | 0.000125 |
| 138 | ENSMUSG0 Ccr5      | 42.69534 | -1.99053 | 0.280034 | -7.10819 | 1.18E-12 | 4.20E-10 |
| 139 | ENSMUSG0 Emilin2   | 195.9059 | -1.99351 | 0.153335 | -13.001  | 1.21E-38 | 3.45E-35 |
| 140 | ENSMUSG0 Plbd1     | 20.56422 | -2.01183 | 0.459845 | -4.37502 | 1.21E-05 | 0.000906 |
| 141 | ENSMUSG0 Lyz2      | 1080.073 | -2.0485  | 0.161358 | -12.6954 | 6.27E-37 | 1.35E-33 |
| 142 | ENSMUSG0 Itga1     | 31.49525 | -2.05737 | 0.342558 | -6.00592 | 1.90E-09 | 4.03E-07 |
| 143 | ENSMUSG0 Lyz1      | 191.1433 | -2.06323 | 0.163933 | -12.5858 | 2.53E-36 | 4.82E-33 |

|     |                    |          |          |          |          |          |          |
|-----|--------------------|----------|----------|----------|----------|----------|----------|
| 144 | ENSMUSG0 Ms4a6d    | 33.36556 | -2.06431 | 0.316847 | -6.51518 | 7.26E-11 | 2.11E-08 |
| 145 | ENSMUSG0 Sqor      | 16.27096 | -2.09588 | 0.448125 | -4.677   | 2.91E-06 | 0.000269 |
| 146 | ENSMUSG0 Clec10a   | 10.36018 | -2.09929 | 0.577392 | -3.63582 | 0.000277 | 0.010779 |
| 147 | ENSMUSG0 Camp      | 9.531274 | -2.10858 | 0.58285  | -3.6177  | 0.000297 | 0.011356 |
| 148 | ENSMUSG0 Lbp       | 18.91681 | -2.1425  | 0.439927 | -4.87012 | 1.12E-06 | 0.000124 |
| 149 | ENSMUSG0 Pid1      | 19.48218 | -2.25819 | 0.429689 | -5.2554  | 1.48E-07 | 2.03E-05 |
| 150 | ENSMUSG0 Ccr2      | 190.5891 | -2.28041 | 0.152639 | -14.9399 | 1.81E-50 | 1.04E-46 |
| 151 | ENSMUSG0 Fcgr1     | 19.5459  | -2.30817 | 0.409313 | -5.63914 | 1.71E-08 | 3.12E-06 |
| 152 | ENSMUSG0 Mefv      | 23.46816 | -2.31563 | 0.394623 | -5.86795 | 4.41E-09 | 8.70E-07 |
| 153 | ENSMUSG0 Clec4a2   | 17.23032 | -2.36674 | 0.45021  | -5.25697 | 1.46E-07 | 2.03E-05 |
| 154 | ENSMUSG0 Ptpro     | 12.06673 | -2.37    | 0.551016 | -4.30115 | 1.70E-05 | 0.00119  |
| 155 | ENSMUSG0 Ifitm6    | 22.15688 | -2.46603 | 0.406204 | -6.07091 | 1.27E-09 | 2.80E-07 |
| 156 | ENSMUSG0 Tlr8      | 11.81156 | -2.51148 | 0.589089 | -4.26332 | 2.01E-05 | 0.00136  |
| 157 | ENSMUSG0 F13a1     | 191.1877 | -2.55691 | 0.142176 | -17.9841 | 2.59E-72 | 2.23E-68 |
| 158 | ENSMUSG0 Spint1    | 32.92738 | -2.58777 | 0.32491  | -7.96458 | 1.66E-15 | 7.90E-13 |
| 159 | ENSMUSG0 Clec4a3   | 10.76204 | -2.59064 | 0.588575 | -4.40155 | 1.07E-05 | 0.000827 |
| 160 | ENSMUSG0 Tgfb1     | 144.9006 | -2.61571 | 0.201571 | -12.9766 | 1.66E-38 | 4.07E-35 |
| 161 | ENSMUSG0 Gpr141    | 65.63687 | -2.66246 | 0.252061 | -10.5628 | 4.43E-26 | 4.75E-23 |
| 162 | ENSMUSG0 Mmp8      | 266.6696 | -2.87151 | 0.138878 | -20.6765 | 5.64E-95 | 9.68E-91 |
| 163 | ENSMUSG0 Vcan      | 517.377  | -2.97832 | 0.222329 | -13.396  | 6.38E-41 | 2.19E-37 |
| 164 | ENSMUSG0 LOC100038 | 11.22156 | -3.02296 | 0.614778 | -4.91717 | 8.78E-07 | 0.000101 |
| 165 | ENSMUSG0 Msr1      | 40.98179 | -3.0381  | 0.326402 | -9.30785 | 1.30E-20 | 1.02E-17 |
| 166 | ENSMUSG0 Sirpb1b   | 8.72671  | -3.09106 | 0.708473 | -4.363   | 1.28E-05 | 0.000936 |
| 167 | ENSMUSG0 Mcub      | 11.83579 | -3.24195 | 0.618637 | -5.24046 | 1.60E-07 | 2.16E-05 |

gene\_group

Up

Down









| number | ensembl  | symbol   | tumor_shP | tumor_shP | tumor_shP | tumor_shP | tumor_shP | tumor_shP |
|--------|----------|----------|-----------|-----------|-----------|-----------|-----------|-----------|
| 1      | ENSMUSG0 | Gm525    | 28.78331  | 5.631869  | 1.10187   | 5.11119   | 3.20E-07  | 0.000138  |
| 1      | ENSMUSG0 | Magi1    | 16.61085  | 4.742567  | 1.407446  | 3.369625  | 0.000753  | 0.030369  |
| 1      | ENSMUSG0 | Kcnk12   | 22.00369  | 4.661107  | 0.945081  | 4.931965  | 8.14E-07  | 0.000257  |
| 1      | ENSMUSG0 | Lrig3    | 11.85311  | 4.037811  | 1.123003  | 3.595549  | 0.000324  | 0.017487  |
| 1      | ENSMUSG0 | 4931431B | 15.76886  | 3.738024  | 1.054552  | 3.544657  | 0.000393  | 0.019767  |
| 1      | ENSMUSG0 | Khdrbs2  | 13.18919  | 3.580577  | 1.115189  | 3.210736  | 0.001324  | 0.041363  |
| 1      | ENSMUSG0 | Cox6a2   | 336.1649  | 3.412879  | 0.987036  | 3.457704  | 0.000545  | 0.02483   |
| 1      | ENSMUSG0 | Col25a1  | 133.3583  | 3.297757  | 0.901599  | 3.657675  | 0.000255  | 0.014685  |
| 1      | ENSMUSG0 | Phyhd1   | 23.86803  | 2.706134  | 0.673747  | 4.016544  | 5.91E-05  | 0.005598  |
| 1      | ENSMUSG0 | AA465934 | 119.2367  | 2.194056  | 0.463187  | 4.736874  | 2.17E-06  | 0.000541  |
| 1      | ENSMUSG0 | Rasl10a  | 65.6135   | 2.150135  | 0.525575  | 4.091012  | 4.29E-05  | 0.004496  |
| 1      | ENSMUSG0 | Camkv    | 980.9291  | 1.961251  | 0.618227  | 3.172382  | 0.001512  | 0.044859  |
| 1      | ENSMUSG0 | Bspry    | 31.85465  | 1.844484  | 0.571213  | 3.229067  | 0.001242  | 0.039437  |
| 1      | ENSMUSG0 | Pfn2     | 68.85849  | 1.812287  | 0.407759  | 4.444509  | 8.81E-06  | 0.001593  |
| 1      | ENSMUSG0 | Gphn     | 149.5939  | 1.746244  | 0.43268   | 4.035874  | 5.44E-05  | 0.005345  |
| 1      | ENSMUSG0 | Usp44    | 182.4647  | 1.723864  | 0.39678   | 4.344634  | 1.40E-05  | 0.0022    |
| 1      | ENSMUSG0 | Fam234b  | 109.4526  | 1.590761  | 0.434467  | 3.661405  | 0.000251  | 0.01466   |
| 1      | ENSMUSG0 | Atp1a3   | 134.0909  | 1.52369   | 0.463317  | 3.288657  | 0.001007  | 0.035179  |
| 1      | ENSMUSG0 | Sh2b2    | 140.1288  | 1.436963  | 0.283227  | 5.073535  | 3.90E-07  | 0.000156  |
| 1      | ENSMUSG0 | Rgcc     | 123.8893  | 1.39064   | 0.409263  | 3.397915  | 0.000679  | 0.028861  |
| 1      | ENSMUSG0 | Mfsd2a   | 103.3745  | 1.385431  | 0.368777  | 3.756823  | 0.000172  | 0.011218  |
| 1      | ENSMUSG0 | Ccdc40   | 203.426   | 1.376173  | 0.353468  | 3.893347  | 9.89E-05  | 0.00784   |
| 1      | ENSMUSG0 | Zcwpw1   | 484.0402  | 1.364119  | 0.275781  | 4.946391  | 7.56E-07  | 0.00025   |
| 1      | ENSMUSG0 | Fzd9     | 124.8425  | 1.360972  | 0.353195  | 3.853312  | 0.000117  | 0.008682  |
| 1      | ENSMUSG0 | Rsph1    | 130.5624  | 1.326664  | 0.403051  | 3.291551  | 0.000996  | 0.035119  |
| 1      | ENSMUSG0 | Arhgap29 | 177.2481  | 1.247914  | 0.39786   | 3.136566  | 0.001709  | 0.048388  |
| 1      | ENSMUSG0 | Rfx3     | 152.4423  | 1.244134  | 0.388373  | 3.20345   | 0.001358  | 0.042133  |
| 1      | ENSMUSG0 | Tnfrsf19 | 310.4576  | 1.219646  | 0.330168  | 3.694018  | 0.000221  | 0.013481  |
| 1      | ENSMUSG0 | Elovl6   | 1189.222  | 1.152746  | 0.142878  | 8.068016  | 7.14E-16  | 4.84E-12  |
| 1      | ENSMUSG0 | Slc39a10 | 835.7154  | 1.14666   | 0.182571  | 6.280613  | 3.37E-10  | 6.53E-07  |
| 1      | ENSMUSG0 | Myc      | 27407.68  | 1.145817  | 0.166915  | 6.864677  | 6.66E-12  | 2.26E-08  |
| 1      | ENSMUSG0 | Slc1a4   | 443.3766  | 1.119308  | 0.230299  | 4.860243  | 1.17E-06  | 0.000324  |
| 1      | ENSMUSG0 | Itih5    | 332.3803  | 1.107046  | 0.316087  | 3.502343  | 0.000461  | 0.022174  |
| 1      | ENSMUSG0 | Neil1    | 679.4868  | 1.084308  | 0.211831  | 5.118733  | 3.08E-07  | 0.000138  |
| 1      | ENSMUSG0 | Jrk      | 115.5482  | 1.011034  | 0.285118  | 3.546019  | 0.000391  | 0.019767  |
| 1      | ENSMUSG0 | H2-Q4    | 1020.388  | -1.00043  | 0.206194  | -4.8519   | 1.22E-06  | 0.000325  |
| 1      | ENSMUSG0 | Haus8    | 123.0669  | -1.00097  | 0.312768  | -3.20035  | 0.001373  | 0.042298  |
| 1      | ENSMUSG0 | Nfkbia   | 753.8858  | -1.00135  | 0.249897  | -4.00703  | 6.15E-05  | 0.005671  |
| 1      | ENSMUSG0 | Selenon  | 105.2733  | -1.00878  | 0.301188  | -3.34934  | 0.00081   | 0.031381  |
| 1      | ENSMUSG0 | Ypel3    | 327.2122  | -1.01544  | 0.242459  | -4.18811  | 2.81E-05  | 0.003598  |
| 1      | ENSMUSG0 | Sh3tc1   | 175.7436  | -1.01564  | 0.286137  | -3.54949  | 0.000386  | 0.019762  |
| 1      | ENSMUSG0 | Gys1     | 147.6685  | -1.02142  | 0.308967  | -3.30594  | 0.000947  | 0.034659  |
| 1      | ENSMUSG0 | Zdhhc1   | 206.5675  | -1.02539  | 0.311611  | -3.29059  | 0.001     | 0.035119  |
| 1      | ENSMUSG0 | Plcb2    | 406.9611  | -1.02623  | 0.250428  | -4.09789  | 4.17E-05  | 0.004451  |
| 1      | ENSMUSG0 | Plekhg3  | 399.2657  | -1.02879  | 0.221762  | -4.63917  | 3.50E-06  | 0.000753  |
| 1      | ENSMUSG0 | Cybb     | 375.4643  | -1.05286  | 0.265455  | -3.96624  | 7.30E-05  | 0.006429  |
| 1      | ENSMUSG0 | Ppp1r16b | 303.9607  | -1.05663  | 0.320486  | -3.29695  | 0.000977  | 0.035044  |

|   |                    |          |          |          |          |          |          |
|---|--------------------|----------|----------|----------|----------|----------|----------|
| 1 | ENSMUSG0 Cyfip1    | 172.1926 | -1.06295 | 0.332009 | -3.20157 | 0.001367 | 0.042216 |
| 1 | ENSMUSG0 Ptms      | 121.3906 | -1.07139 | 0.338459 | -3.16551 | 0.001548 | 0.045534 |
| 1 | ENSMUSG0 Sp140     | 191.2426 | -1.07204 | 0.26923  | -3.98187 | 6.84E-05 | 0.006222 |
| 1 | ENSMUSG0 Batf      | 122.5836 | -1.07629 | 0.325675 | -3.3048  | 0.00095  | 0.034659 |
| 1 | ENSMUSG0 Slc28a2   | 448.6699 | -1.09172 | 0.270856 | -4.03064 | 5.56E-05 | 0.005426 |
| 1 | ENSMUSG0 Cryl1     | 251.9906 | -1.09329 | 0.234127 | -4.66966 | 3.02E-06 | 0.000682 |
| 1 | ENSMUSG0 Relb      | 142.7322 | -1.09967 | 0.350858 | -3.13423 | 0.001723 | 0.048571 |
| 1 | ENSMUSG0 Irf1      | 395.8823 | -1.11267 | 0.190611 | -5.83738 | 5.30E-09 | 5.99E-06 |
| 1 | ENSMUSG0 Fes       | 126.2026 | -1.11993 | 0.316037 | -3.54366 | 0.000395 | 0.019767 |
| 1 | ENSMUSG0 Enc1      | 169.7456 | -1.12338 | 0.334178 | -3.36162 | 0.000775 | 0.030748 |
| 1 | ENSMUSG0 Slc12a7   | 209.291  | -1.13006 | 0.287177 | -3.93505 | 8.32E-05 | 0.006962 |
| 1 | ENSMUSG0 Neur13    | 316.7609 | -1.13957 | 0.261622 | -4.35577 | 1.33E-05 | 0.002135 |
| 1 | ENSMUSG0 Ypel5     | 167.6625 | -1.15169 | 0.279721 | -4.11728 | 3.83E-05 | 0.004226 |
| 1 | ENSMUSG0 Ttc28     | 343.9663 | -1.15192 | 0.327889 | -3.51313 | 0.000443 | 0.021642 |
| 1 | ENSMUSG0 Tspoap1   | 801.0403 | -1.1551  | 0.223955 | -5.15773 | 2.50E-07 | 0.00013  |
| 1 | ENSMUSG0 Tmem181a  | 160.6607 | -1.16687 | 0.26934  | -4.33232 | 1.48E-05 | 0.002299 |
| 1 | ENSMUSG0 Cd82      | 250.2079 | -1.16785 | 0.301971 | -3.86741 | 0.00011  | 0.008422 |
| 1 | ENSMUSG0 Zfp831    | 155.8733 | -1.17482 | 0.319112 | -3.68152 | 0.000232 | 0.013793 |
| 1 | ENSMUSG0 Cpeb4     | 113.0917 | -1.18754 | 0.335238 | -3.54238 | 0.000397 | 0.019767 |
| 1 | ENSMUSG0 Clec2i    | 209.0934 | -1.1881  | 0.366066 | -3.24559 | 0.001172 | 0.03825  |
| 1 | ENSMUSG0 H2-T-ps   | 159.7571 | -1.19401 | 0.322069 | -3.7073  | 0.000209 | 0.012911 |
| 1 | ENSMUSG0 H2-T10    | 221.2672 | -1.1969  | 0.274914 | -4.35373 | 1.34E-05 | 0.002135 |
| 1 | ENSMUSG0 Ifi214    | 94.47558 | -1.20244 | 0.326624 | -3.68143 | 0.000232 | 0.013793 |
| 1 | ENSMUSG0 Slc7a7    | 113.1415 | -1.2179  | 0.342553 | -3.55535 | 0.000377 | 0.019535 |
| 1 | ENSMUSG0 Ifi2712a  | 226.828  | -1.21986 | 0.235965 | -5.16966 | 2.35E-07 | 0.000127 |
| 1 | ENSMUSG0 Rhof      | 159.4982 | -1.22708 | 0.294514 | -4.16645 | 3.09E-05 | 0.003849 |
| 1 | ENSMUSG0 Nfatc2    | 111.3369 | -1.24169 | 0.343935 | -3.61025 | 0.000306 | 0.016861 |
| 1 | ENSMUSG0 Cdkn1a    | 83.05364 | -1.24805 | 0.362463 | -3.44326 | 0.000575 | 0.025535 |
| 1 | ENSMUSG0 Epsti1    | 225.0573 | -1.25113 | 0.294112 | -4.25393 | 2.10E-05 | 0.003062 |
| 1 | ENSMUSG0 Gvin1     | 1106.687 | -1.25145 | 0.248528 | -5.03544 | 4.77E-07 | 0.00018  |
| 1 | ENSMUSG0 Ulbp1     | 304.6864 | -1.25801 | 0.288111 | -4.36641 | 1.26E-05 | 0.002063 |
| 1 | ENSMUSG0 Carns1    | 104.6721 | -1.26197 | 0.362224 | -3.48393 | 0.000494 | 0.023167 |
| 1 | ENSMUSG0 Zswim8    | 530.1656 | -1.26213 | 0.232415 | -5.43051 | 5.62E-08 | 3.63E-05 |
| 1 | ENSMUSG0 Dennd2d   | 169.7095 | -1.26282 | 0.38836  | -3.25168 | 0.001147 | 0.037757 |
| 1 | ENSMUSG0 3300005Di | 160.8318 | -1.27402 | 0.299816 | -4.24933 | 2.14E-05 | 0.003093 |
| 1 | ENSMUSG0 P2rx7     | 119.7884 | -1.2784  | 0.399765 | -3.19788 | 0.001384 | 0.04247  |
| 1 | ENSMUSG0 H2-Oa     | 112.2279 | -1.28295 | 0.36008  | -3.56295 | 0.000367 | 0.019198 |
| 1 | ENSMUSG0 Plbd1     | 173.6997 | -1.28935 | 0.398625 | -3.23449 | 0.001219 | 0.03897  |
| 1 | ENSMUSG0 Gm4070    | 953.8173 | -1.30789 | 0.248618 | -5.26063 | 1.44E-07 | 8.11E-05 |
| 1 | ENSMUSG0 Lcn2      | 94.50307 | -1.31095 | 0.403963 | -3.24522 | 0.001174 | 0.03825  |
| 1 | ENSMUSG0 Nfkbiz    | 119.8729 | -1.3133  | 0.346859 | -3.78627 | 0.000153 | 0.010214 |
| 1 | ENSMUSG0 Lgals3bp  | 241.0404 | -1.31406 | 0.310493 | -4.23218 | 2.31E-05 | 0.003134 |
| 1 | ENSMUSG0 Nfkb2     | 286.8606 | -1.31707 | 0.28013  | -4.70164 | 2.58E-06 | 0.000603 |
| 1 | ENSMUSG0 Zbtb7b    | 190.5281 | -1.32148 | 0.346107 | -3.81813 | 0.000134 | 0.009447 |
| 1 | ENSMUSG0 Naip2     | 131.1005 | -1.32333 | 0.378278 | -3.49831 | 0.000468 | 0.022276 |
| 1 | ENSMUSG0 Slc43a1   | 292.0946 | -1.32355 | 0.35349  | -3.74423 | 0.000181 | 0.011651 |
| 1 | ENSMUSG0 Klif6     | 212.0697 | -1.32499 | 0.329409 | -4.02231 | 5.76E-05 | 0.005542 |
| 1 | ENSMUSG0 Pgap1     | 166.8763 | -1.35352 | 0.428143 | -3.16138 | 0.00157  | 0.045855 |

|   |          |         |          |          |          |          |          |          |
|---|----------|---------|----------|----------|----------|----------|----------|----------|
| 1 | ENSMUSG0 | 8-Mar   | 74.20228 | -1.36779 | 0.380726 | -3.59259 | 0.000327 | 0.017547 |
| 1 | ENSMUSG0 | Gbp7    | 84.3095  | -1.37202 | 0.40842  | -3.35934 | 0.000781 | 0.030883 |
| 1 | ENSMUSG0 | Ltf     | 163.4103 | -1.38599 | 0.328784 | -4.2155  | 2.49E-05 | 0.003249 |
| 1 | ENSMUSG0 | Trim30a | 226.0165 | -1.41106 | 0.290319 | -4.86038 | 1.17E-06 | 0.000324 |
| 1 | ENSMUSG0 | Gng2    | 371.9885 | -1.42313 | 0.218072 | -6.52598 | 6.76E-11 | 1.83E-07 |
| 1 | ENSMUSG0 | St3gal6 | 83.64508 | -1.42763 | 0.367136 | -3.88856 | 0.000101 | 0.007904 |
| 1 | ENSMUSG0 | Wsb2    | 69.65876 | -1.43281 | 0.425695 | -3.36582 | 0.000763 | 0.030527 |
| 1 | ENSMUSG0 | Il2rb   | 151.914  | -1.45234 | 0.428706 | -3.38773 | 0.000705 | 0.029133 |
| 1 | ENSMUSG0 | Fam241a | 91.61005 | -1.46098 | 0.407635 | -3.58404 | 0.000338 | 0.017989 |
| 1 | ENSMUSG0 | Il27ra  | 159.7765 | -1.4804  | 0.45355  | -3.26404 | 0.001098 | 0.037046 |
| 1 | ENSMUSG0 | Natd1   | 92.98955 | -1.49557 | 0.35274  | -4.23987 | 2.24E-05 | 0.003134 |
| 1 | ENSMUSG0 | Jak2    | 288.7337 | -1.49657 | 0.309983 | -4.82791 | 1.38E-06 | 0.00036  |
| 1 | ENSMUSG0 | Naip6   | 148.2737 | -1.51794 | 0.29778  | -5.09753 | 3.44E-07 | 0.000141 |
| 1 | ENSMUSG0 | Cd4     | 140.6197 | -1.52251 | 0.459033 | -3.31677 | 0.000911 | 0.034015 |
| 1 | ENSMUSG0 | Fyb     | 135.8437 | -1.52463 | 0.432504 | -3.52512 | 0.000423 | 0.020947 |
| 1 | ENSMUSG0 | Gramd1b | 75.39781 | -1.5389  | 0.409765 | -3.75558 | 0.000173 | 0.01122  |
| 1 | ENSMUSG0 | 1-Mar   | 139.5417 | -1.5415  | 0.45482  | -3.38924 | 0.000701 | 0.029093 |
| 1 | ENSMUSG0 | Lcp2    | 101.9455 | -1.55597 | 0.47984  | -3.24268 | 0.001184 | 0.038318 |
| 1 | ENSMUSG0 | Nrip1   | 70.40139 | -1.55777 | 0.425747 | -3.65892 | 0.000253 | 0.01468  |
| 1 | ENSMUSG0 | Aim2    | 141.294  | -1.56252 | 0.353133 | -4.42472 | 9.66E-06 | 0.0017   |
| 1 | ENSMUSG0 | Insr    | 244.8958 | -1.56521 | 0.272004 | -5.75436 | 8.70E-09 | 9.07E-06 |
| 1 | ENSMUSG0 | Myo7a   | 529.6861 | -1.56995 | 0.257288 | -6.10194 | 1.05E-09 | 1.78E-06 |
| 1 | ENSMUSG0 | Map3k9  | 57.0098  | -1.57316 | 0.468404 | -3.35855 | 0.000784 | 0.030883 |
| 1 | ENSMUSG0 | Dnajb5  | 41.10252 | -1.59568 | 0.50076  | -3.18652 | 0.00144  | 0.043484 |
| 1 | ENSMUSG0 | Ngp     | 249.085  | -1.59815 | 0.346863 | -4.60742 | 4.08E-06 | 0.000833 |
| 1 | ENSMUSG0 | Gbp9    | 151.6186 | -1.60062 | 0.466238 | -3.43305 | 0.000597 | 0.026274 |
| 1 | ENSMUSG0 | Abr     | 162.0742 | -1.61122 | 0.38088  | -4.23024 | 2.33E-05 | 0.003134 |
| 1 | ENSMUSG0 | Rgs2    | 357.6059 | -1.62051 | 0.333862 | -4.85383 | 1.21E-06 | 0.000325 |
| 1 | ENSMUSG0 | Ly6a    | 137.7931 | -1.631   | 0.438032 | -3.72348 | 0.000196 | 0.012319 |
| 1 | ENSMUSG0 | Tjp3    | 78.30908 | -1.6382  | 0.395228 | -4.14494 | 3.40E-05 | 0.004025 |
| 1 | ENSMUSG0 | Rflnb   | 76.71016 | -1.64447 | 0.522577 | -3.14684 | 0.00165  | 0.04723  |
| 1 | ENSMUSG0 | Pimreg  | 125.8442 | -1.65767 | 0.281858 | -5.88124 | 4.07E-09 | 5.02E-06 |
| 1 | ENSMUSG0 | Gbp5    | 54.02168 | -1.66201 | 0.522977 | -3.17799 | 0.001483 | 0.044291 |
| 1 | ENSMUSG0 | Tspan17 | 49.48663 | -1.6661  | 0.433577 | -3.84269 | 0.000122 | 0.009016 |
| 1 | ENSMUSG0 | Tgtp2   | 79.42783 | -1.68711 | 0.446826 | -3.77576 | 0.00016  | 0.010603 |
| 1 | ENSMUSG0 | Zbtb32  | 183.0831 | -1.69666 | 0.392426 | -4.32351 | 1.54E-05 | 0.002366 |
| 1 | ENSMUSG0 | Gabbr1  | 54.16535 | -1.69948 | 0.534196 | -3.18138 | 0.001466 | 0.04397  |
| 1 | ENSMUSG0 | H1f0    | 144.0134 | -1.69952 | 0.384421 | -4.42098 | 9.83E-06 | 0.001708 |
| 1 | ENSMUSG0 | Prkch   | 84.65404 | -1.701   | 0.508988 | -3.34192 | 0.000832 | 0.031959 |
| 1 | ENSMUSG0 | Maf     | 58.98205 | -1.70564 | 0.486034 | -3.50931 | 0.000449 | 0.021834 |
| 1 | ENSMUSG0 | Traf1   | 113.09   | -1.71186 | 0.447981 | -3.82127 | 0.000133 | 0.009376 |
| 1 | ENSMUSG0 | Eil2    | 47.86649 | -1.71646 | 0.539147 | -3.18365 | 0.001454 | 0.04382  |
| 1 | ENSMUSG0 | H2-Q5   | 260.7811 | -1.72326 | 0.320383 | -5.37873 | 7.50E-08 | 4.42E-05 |
| 1 | ENSMUSG0 | Itgax   | 67.74998 | -1.72428 | 0.526194 | -3.27689 | 0.00105  | 0.036211 |
| 1 | ENSMUSG0 | Inpp4b  | 125.3727 | -1.73163 | 0.509917 | -3.3959  | 0.000684 | 0.028894 |
| 1 | ENSMUSG0 | Tes     | 59.28208 | -1.73344 | 0.530789 | -3.26578 | 0.001092 | 0.036997 |
| 1 | ENSMUSG0 | Acss2   | 57.86389 | -1.74931 | 0.412706 | -4.23863 | 2.25E-05 | 0.003134 |
| 1 | ENSMUSG0 | Cxcr5   | 115.3893 | -1.76266 | 0.473253 | -3.72456 | 0.000196 | 0.012319 |

|   |                    |          |          |          |          |          |          |
|---|--------------------|----------|----------|----------|----------|----------|----------|
| 1 | ENSMUSG0 Ccr6      | 62.7344  | -1.7666  | 0.533882 | -3.30896 | 0.000936 | 0.034562 |
| 1 | ENSMUSG0 Phf23     | 594.3485 | -1.78129 | 0.173988 | -10.238  | 1.34E-24 | 1.82E-20 |
| 1 | ENSMUSG0 Ii21r     | 179.7635 | -1.79663 | 0.440818 | -4.07567 | 4.59E-05 | 0.004749 |
| 1 | ENSMUSG0 Gbp3      | 116.6477 | -1.80034 | 0.363138 | -4.95772 | 7.13E-07 | 0.000242 |
| 1 | ENSMUSG0 Ppp1r15a  | 710.245  | -1.82613 | 0.472395 | -3.86568 | 0.000111 | 0.008422 |
| 1 | ENSMUSG0 Gpr68     | 40.48896 | -1.82912 | 0.5602   | -3.26512 | 0.001094 | 0.036997 |
| 1 | ENSMUSG0 Serpinb6b | 54.73976 | -1.83643 | 0.550132 | -3.33815 | 0.000843 | 0.032212 |
| 1 | ENSMUSG0 Rtn4rl2   | 60.67371 | -1.83832 | 0.57528  | -3.19552 | 0.001396 | 0.042529 |
| 1 | ENSMUSG0 Gbp4      | 118.8761 | -1.86353 | 0.503602 | -3.70039 | 0.000215 | 0.013207 |
| 1 | ENSMUSG0 Cd3d      | 89.02312 | -1.87737 | 0.517532 | -3.62754 | 0.000286 | 0.016135 |
| 1 | ENSMUSG0 Zfp28     | 37.0372  | -1.8784  | 0.574685 | -3.26857 | 0.001081 | 0.036824 |
| 1 | ENSMUSG0 Ctsw      | 79.52861 | -1.8884  | 0.570108 | -3.31236 | 0.000925 | 0.034379 |
| 1 | ENSMUSG0 Cd247     | 59.50082 | -1.89048 | 0.567067 | -3.33378 | 0.000857 | 0.032561 |
| 1 | ENSMUSG0 Smtn      | 42.48791 | -1.89384 | 0.555924 | -3.40665 | 0.000658 | 0.028041 |
| 1 | ENSMUSG0 Ii9r      | 93.08407 | -1.89902 | 0.53563  | -3.5454  | 0.000392 | 0.019767 |
| 1 | ENSMUSG0 Osbpl5    | 95.55    | -1.90874 | 0.403145 | -4.73464 | 2.19E-06 | 0.000541 |
| 1 | ENSMUSG0 Cyp2d22   | 48.01231 | -1.92327 | 0.58317  | -3.29796 | 0.000974 | 0.035044 |
| 1 | ENSMUSG0 Rgs12     | 33.32989 | -1.94607 | 0.540672 | -3.59934 | 0.000319 | 0.017302 |
| 1 | ENSMUSG0 Casp7     | 223.2904 | -1.95083 | 0.341518 | -5.71223 | 1.12E-08 | 9.53E-06 |
| 1 | ENSMUSG0 Pla2g16   | 27.9691  | -1.97061 | 0.604207 | -3.26149 | 0.001108 | 0.037235 |
| 1 | ENSMUSG0 H2-Q6     | 786.5684 | -1.98349 | 0.609312 | -3.2553  | 0.001133 | 0.037736 |
| 1 | ENSMUSG0 Xlr4b     | 87.25763 | -1.98404 | 0.54557  | -3.63663 | 0.000276 | 0.015803 |
| 1 | ENSMUSG0 Zbp1      | 57.90638 | -1.99925 | 0.623157 | -3.20826 | 0.001335 | 0.041529 |
| 1 | ENSMUSG0 Ms4a4c    | 89.9267  | -2.00598 | 0.522766 | -3.83724 | 0.000124 | 0.009119 |
| 1 | ENSMUSG0 Naip5     | 93.10844 | -2.00761 | 0.349909 | -5.73753 | 9.61E-09 | 9.30E-06 |
| 1 | ENSMUSG0 Dnase1l3  | 28.95784 | -2.03383 | 0.621265 | -3.27369 | 0.001062 | 0.036498 |
| 1 | ENSMUSG0 Nav1      | 36.10089 | -2.03499 | 0.651239 | -3.12479 | 0.001779 | 0.04958  |
| 1 | ENSMUSG0 Gem       | 42.53933 | -2.04314 | 0.592453 | -3.44862 | 0.000563 | 0.025368 |
| 1 | ENSMUSG0 Zcchc14   | 41.64807 | -2.07865 | 0.660512 | -3.14703 | 0.001649 | 0.04723  |
| 1 | ENSMUSG0 Ctnna1    | 248.9975 | -2.08238 | 0.323274 | -6.44154 | 1.18E-10 | 2.67E-07 |
| 1 | ENSMUSG0 Cd83      | 134.3516 | -2.09411 | 0.426757 | -4.90702 | 9.25E-07 | 0.000279 |
| 1 | ENSMUSG0 Trim30b   | 44.14804 | -2.11643 | 0.650502 | -3.25354 | 0.00114  | 0.037757 |
| 1 | ENSMUSG0 Rasgrp3   | 107.1298 | -2.13207 | 0.516055 | -4.13148 | 3.60E-05 | 0.004142 |
| 1 | ENSMUSG0 Lair1     | 43.07514 | -2.13334 | 0.521576 | -4.09018 | 4.31E-05 | 0.004496 |
| 1 | ENSMUSG0 Gpr174    | 89.23805 | -2.15576 | 0.551297 | -3.91034 | 9.22E-05 | 0.007483 |
| 1 | ENSMUSG0 Lta       | 27.72446 | -2.1643  | 0.654166 | -3.30848 | 0.000938 | 0.034562 |
| 1 | ENSMUSG0 Tmprss13  | 66.11552 | -2.16449 | 0.521455 | -4.15087 | 3.31E-05 | 0.00401  |
| 1 | ENSMUSG0 Izumo1r   | 42.55954 | -2.20321 | 0.57473  | -3.83348 | 0.000126 | 0.009146 |
| 1 | ENSMUSG0 Cd96      | 35.55185 | -2.23869 | 0.662746 | -3.3779  | 0.00073  | 0.029741 |
| 1 | ENSMUSG0 Wwc2      | 56.98624 | -2.32621 | 0.505108 | -4.60538 | 4.12E-06 | 0.000833 |
| 1 | ENSMUSG0 Nod1      | 49.14185 | -2.36349 | 0.60702  | -3.8936  | 9.88E-05 | 0.00784  |
| 1 | ENSMUSG0 Gadd45g   | 48.73655 | -2.43753 | 0.636004 | -3.83257 | 0.000127 | 0.009146 |
| 1 | ENSMUSG0 Gbp2      | 48.66993 | -2.47539 | 0.591801 | -4.18281 | 2.88E-05 | 0.003649 |
| 1 | ENSMUSG0 Tsc22d1   | 33.6692  | -2.4773  | 0.677071 | -3.65886 | 0.000253 | 0.01468  |
| 1 | ENSMUSG0 Gcat      | 288.0092 | -2.52994 | 0.672849 | -3.76004 | 0.00017  | 0.011128 |
| 1 | ENSMUSG0 Mfsd13a   | 17.35876 | -2.53885 | 0.806694 | -3.14722 | 0.001648 | 0.04723  |
| 1 | ENSMUSG0 St8sia6   | 32.45084 | -2.60748 | 0.675685 | -3.85901 | 0.000114 | 0.008576 |
| 1 | ENSMUSG0 Ctdspl    | 33.55265 | -2.62682 | 0.693061 | -3.79018 | 0.000151 | 0.010214 |

|   |                  |          |          |          |          |          |          |
|---|------------------|----------|----------|----------|----------|----------|----------|
| 1 | ENSMUSG0 Tdrd7   | 79.75722 | -2.7226  | 0.529991 | -5.13707 | 2.79E-07 | 0.000138 |
| 1 | ENSMUSG0 Cd200   | 36.19797 | -2.81574 | 0.743001 | -3.78969 | 0.000151 | 0.010214 |
| 1 | ENSMUSG0 Platr27 | 31.73736 | -2.82486 | 0.872069 | -3.23926 | 0.001198 | 0.038506 |
| 1 | ENSMUSG0 Klf4    | 97.00337 | -2.86235 | 0.58039  | -4.93178 | 8.15E-07 | 0.000257 |
| 1 | ENSMUSG0 Armc3   | 20.74781 | -2.91975 | 0.812448 | -3.59378 | 0.000326 | 0.017536 |
| 1 | ENSMUSG0 Kynu    | 18.13805 | -3.01251 | 0.920549 | -3.27251 | 0.001066 | 0.036498 |
| 1 | ENSMUSG0 Jun     | 826.2979 | -3.22606 | 1.025205 | -3.14675 | 0.001651 | 0.04723  |
| 1 | ENSMUSG0 Gfra2   | 23.79783 | -3.25094 | 0.932266 | -3.48714 | 0.000488 | 0.02303  |
| 1 | ENSMUSG0 Egr3    | 20.21442 | -3.45611 | 0.969278 | -3.56565 | 0.000363 | 0.019164 |
| 1 | ENSMUSG0 Kdelc2  | 33.76256 | -3.52892 | 0.690939 | -5.10742 | 3.27E-07 | 0.000138 |
| 1 | ENSMUSG0 Ccdc180 | 76.28113 | -3.57279 | 0.651883 | -5.48072 | 4.24E-08 | 3.02E-05 |
| 1 | ENSMUSG0 Siglech | 55.96671 | -3.68871 | 0.659904 | -5.58977 | 2.27E-08 | 1.81E-05 |
| 1 | ENSMUSG0 Tdrp    | 14.27045 | -4.13915 | 1.1799   | -3.50805 | 0.000451 | 0.021859 |
| 1 | ENSMUSG0 Frmd6   | 15.70159 | -4.27699 | 1.079866 | -3.96066 | 7.47E-05 | 0.006455 |
| 1 | ENSMUSG0 Kif5a   | 15.09798 | -4.66953 | 1.36399  | -3.42344 | 0.000618 | 0.027026 |
| 1 | ENSMUSG0 Prol1   | 24.31519 | -4.95296 | 1.08755  | -4.55424 | 5.26E-06 | 0.001033 |
| 1 | ENSMUSG0 Zfp951  | 94.03741 | -5.49241 | 1.101055 | -4.98832 | 6.09E-07 | 0.000212 |
| 1 | ENSMUSG0 Mucl2   | 47.99294 | -7.81493 | 1.315553 | -5.94041 | 2.84E-09 | 3.85E-06 |
| 1 | ENSMUSG0 Klf1    | 28.16056 | -8.01438 | 2.183284 | -3.67079 | 0.000242 | 0.014255 |
| 1 | ENSMUSG0 Bpifa2  | 38.42648 | -8.46335 | 2.22965  | -3.79582 | 0.000147 | 0.010077 |

gene\_group

Up

Down











| number | ensembl  | symbol    | Drug_VS_D | Drug_VS_D | Drug_VS_D | Drug_VS_D | Drug_VS_D | Drug_VS_D |
|--------|----------|-----------|-----------|-----------|-----------|-----------|-----------|-----------|
| 1      | ENSMUSG0 | Dbn1      | 7.419636  | 5.834642  | 1.255205  | 4.648358  | 3.35E-06  | 2.92E-05  |
| 2      | ENSMUSG0 | Gm4610    | 5.600916  | 4.437013  | 1.270425  | 3.492543  | 0.000478  | 0.002467  |
| 3      | ENSMUSG0 | Gimap7    | 5.271569  | 4.348041  | 1.295316  | 3.356741  | 0.000789  | 0.003813  |
| 4      | ENSMUSG0 | Dnm3      | 19.4088   | 4.34071   | 0.79074   | 5.489429  | 4.03E-08  | 5.17E-07  |
| 5      | ENSMUSG0 | Gm18853   | 4.262977  | 4.023586  | 1.310605  | 3.070021  | 0.00214   | 0.009044  |
| 6      | ENSMUSG0 | Btnl2     | 10.74269  | 3.874048  | 0.913804  | 4.239476  | 2.24E-05  | 0.000163  |
| 7      | ENSMUSG0 | Itgal     | 32.87437  | 3.76167   | 0.544204  | 6.912248  | 4.77E-12  | 1.16E-10  |
| 8      | ENSMUSG0 | Colq      | 9.266189  | 3.671047  | 0.905724  | 4.053161  | 5.05E-05  | 0.000339  |
| 9      | ENSMUSG0 | Lrrc25    | 6.180223  | 3.664126  | 1.121262  | 3.26786   | 0.001084  | 0.005017  |
| 10     | ENSMUSG0 | Ly6c2     | 16.93697  | 3.295531  | 0.630715  | 5.225068  | 1.74E-07  | 1.98E-06  |
| 11     | ENSMUSG0 | Plxnb3    | 6.594188  | 3.160887  | 0.946185  | 3.340666  | 0.000836  | 0.003995  |
| 12     | ENSMUSG0 | Sh2d6     | 48.30972  | 3.087996  | 0.36103   | 8.553292  | 1.20E-17  | 5.57E-16  |
| 13     | ENSMUSG0 | Fcgr3     | 20.11366  | 3.021009  | 0.537568  | 5.619773  | 1.91E-08  | 2.60E-07  |
| 14     | ENSMUSG0 | Ildr1     | 8.09708   | 3.012538  | 0.840403  | 3.584637  | 0.000338  | 0.001815  |
| 15     | ENSMUSG0 | Prf1      | 29.26523  | 2.968221  | 0.460573  | 6.444626  | 1.16E-10  | 2.31E-09  |
| 16     | ENSMUSG0 | Pira2     | 7.640154  | 2.925765  | 0.841264  | 3.477819  | 0.000506  | 0.00259   |
| 17     | ENSMUSG0 | Gramd1b   | 11.31373  | 2.912395  | 0.673686  | 4.323074  | 1.54E-05  | 0.000117  |
| 18     | ENSMUSG0 | Gm11827   | 5.523048  | 2.869893  | 0.960733  | 2.987191  | 0.002816  | 0.011437  |
| 19     | ENSMUSG0 | Cdh6      | 7.048002  | 2.823468  | 0.846257  | 3.336417  | 0.000849  | 0.004053  |
| 20     | ENSMUSG0 | Pira1     | 5.303042  | 2.808373  | 0.967009  | 2.904184  | 0.003682  | 0.014408  |
| 21     | ENSMUSG0 | Ddx58     | 103.6096  | 2.773155  | 0.238753  | 11.61514  | 3.45E-31  | 4.23E-29  |
| 22     | ENSMUSG0 | Nxpe4     | 11.91527  | 2.766522  | 0.66805   | 4.141191  | 3.46E-05  | 0.00024   |
| 23     | ENSMUSG0 | Map3k19   | 4.829699  | 2.667675  | 0.978726  | 2.72566   | 0.006417  | 0.02312   |
| 24     | ENSMUSG0 | Fgd4      | 6.477756  | 2.659076  | 0.850219  | 3.12752   | 0.001763  | 0.00762   |
| 25     | ENSMUSG0 | Ptgir     | 29.24244  | 2.609391  | 0.419339  | 6.222623  | 4.89E-10  | 8.81E-09  |
| 26     | ENSMUSG0 | Lamb3     | 10.53534  | 2.54194   | 0.693784  | 3.663878  | 0.000248  | 0.001377  |
| 27     | ENSMUSG0 | Cxcr5     | 34.97915  | 2.514331  | 0.387513  | 6.488385  | 8.68E-11  | 1.77E-09  |
| 28     | ENSMUSG0 | Pla2g7    | 4.307801  | 2.500254  | 1.013388  | 2.467224  | 0.013617  | 0.043577  |
| 29     | ENSMUSG0 | H2-DMb2   | 76.04674  | 2.485941  | 0.259262  | 9.588519  | 8.94E-22  | 5.73E-20  |
| 30     | ENSMUSG0 | Cfap54    | 8.61215   | 2.485571  | 0.743071  | 3.344999  | 0.000823  | 0.003949  |
| 31     | ENSMUSG0 | Gimap6    | 190.7283  | 2.45394   | 0.16104   | 15.2381   | 1.98E-52  | 6.63E-50  |
| 32     | ENSMUSG0 | Rbpjl     | 19.44799  | 2.445058  | 0.469605  | 5.206631  | 1.92E-07  | 2.17E-06  |
| 33     | ENSMUSG0 | Ankrd55   | 38.58516  | 2.438853  | 0.376762  | 6.473195  | 9.60E-11  | 1.94E-09  |
| 34     | ENSMUSG0 | Ms4a1     | 136.5361  | 2.411907  | 0.189021  | 12.76001  | 2.74E-37  | 4.37E-35  |
| 35     | ENSMUSG0 | Gm5547    | 24.40962  | 2.409708  | 0.429617  | 5.608967  | 2.04E-08  | 2.75E-07  |
| 36     | ENSMUSG0 | St3gal6   | 28.37295  | 2.390466  | 0.421806  | 5.667218  | 1.45E-08  | 2.03E-07  |
| 37     | ENSMUSG0 | Slc52a3   | 8.046485  | 2.389632  | 0.725013  | 3.295985  | 0.000981  | 0.004595  |
| 38     | ENSMUSG0 | Rapgef4   | 13.31915  | 2.374075  | 0.565506  | 4.19814   | 2.69E-05  | 0.000192  |
| 39     | ENSMUSG0 | LOC102636 | 9.045762  | 2.34572   | 0.688819  | 3.405422  | 0.000661  | 0.003269  |
| 40     | ENSMUSG0 | Gimap5    | 5.239579  | 2.327597  | 0.907491  | 2.564872  | 0.010321  | 0.034527  |
| 41     | ENSMUSG0 | Gvin1     | 390.4697  | 2.326824  | 0.142304  | 16.35112  | 4.27E-60  | 1.94E-57  |
| 42     | ENSMUSG0 | Cd101     | 7.77177   | 2.325334  | 0.797232  | 2.91676   | 0.003537  | 0.013906  |
| 43     | ENSMUSG0 | Cybb      | 118.3772  | 2.299578  | 0.247636  | 9.286117  | 1.60E-20  | 9.33E-19  |
| 44     | ENSMUSG0 | Klrb1     | 19.92892  | 2.271345  | 0.453272  | 5.010998  | 5.41E-07  | 5.56E-06  |
| 45     | ENSMUSG0 | Gm15880   | 16.04525  | 2.258607  | 0.485125  | 4.655717  | 3.23E-06  | 2.82E-05  |
| 46     | ENSMUSG0 | Pirb      | 41.80365  | 2.251828  | 0.315996  | 7.126123  | 1.03E-12  | 2.74E-11  |
| 47     | ENSMUSG0 | Gm4070    | 330.4838  | 2.247282  | 0.14526   | 15.47071  | 5.47E-54  | 1.97E-51  |

|    |                    |          |          |          |          |          |          |
|----|--------------------|----------|----------|----------|----------|----------|----------|
| 48 | ENSMUSG0 Lair1     | 14.74381 | 2.245196 | 0.523319 | 4.290304 | 1.78E-05 | 0.000133 |
| 49 | ENSMUSG0 Sidt1     | 7.341124 | 2.242206 | 0.744418 | 3.012024 | 0.002595 | 0.010645 |
| 50 | ENSMUSG0 Slamf9    | 109.3115 | 2.217    | 0.212521 | 10.43193 | 1.77E-25 | 1.49E-23 |
| 51 | ENSMUSG0 Rnase6    | 33.44156 | 2.198031 | 0.352014 | 6.244157 | 4.26E-10 | 7.79E-09 |
| 52 | ENSMUSG0 Fndc7     | 4.825448 | 2.19271  | 0.885937 | 2.475019 | 0.013323 | 0.042744 |
| 53 | ENSMUSG0 Rcan2     | 35.72648 | 2.186683 | 0.333918 | 6.548559 | 5.81E-11 | 1.22E-09 |
| 54 | ENSMUSG0 Samd9l    | 242.7168 | 2.1188   | 0.135927 | 15.58773 | 8.82E-55 | 3.24E-52 |
| 55 | ENSMUSG0 Ffar2     | 6.730665 | 2.117501 | 0.730242 | 2.899727 | 0.003735 | 0.014581 |
| 56 | ENSMUSG0 LOC671911 | 36.84735 | 2.096444 | 0.321292 | 6.525046 | 6.80E-11 | 1.42E-09 |
| 57 | ENSMUSG0 Eno2      | 10.05202 | 2.081591 | 0.617447 | 3.371286 | 0.000748 | 0.003644 |
| 58 | ENSMUSG0 Ly6a      | 7.730365 | 2.073955 | 0.728446 | 2.847095 | 0.004412 | 0.016763 |
| 59 | ENSMUSG0 Gh        | 16.56578 | 2.073781 | 0.49133  | 4.220748 | 2.43E-05 | 0.000176 |
| 60 | ENSMUSG0 Plxnc1    | 17.51453 | 2.065714 | 0.459023 | 4.500244 | 6.79E-06 | 5.54E-05 |
| 61 | ENSMUSG0 Evi2      | 16.44808 | 2.055009 | 0.474339 | 4.332365 | 1.48E-05 | 0.000112 |
| 62 | ENSMUSG0 Selp      | 6.555297 | 2.048144 | 0.762669 | 2.685496 | 0.007242 | 0.025572 |
| 63 | ENSMUSG0 Fcrl1     | 167.3861 | 2.040795 | 0.16136  | 12.6475  | 1.15E-36 | 1.77E-34 |
| 64 | ENSMUSG0 Pinlyp    | 78.96731 | 2.038046 | 0.236302 | 8.624738 | 6.42E-18 | 3.08E-16 |
| 65 | ENSMUSG0 Zc3h12d   | 118.5597 | 2.034277 | 0.224107 | 9.077251 | 1.11E-19 | 6.12E-18 |
| 66 | ENSMUSG0 Cd93      | 405.7379 | 2.032359 | 0.134721 | 15.08571 | 2.01E-51 | 6.47E-49 |
| 67 | ENSMUSG0 Extl1     | 46.48126 | 2.03115  | 0.282265 | 7.195907 | 6.20E-13 | 1.70E-11 |
| 68 | ENSMUSG0 Pik3cg    | 110.4771 | 2.02326  | 0.212877 | 9.504372 | 2.01E-21 | 1.27E-19 |
| 69 | ENSMUSG0 Lax1      | 227.9875 | 2.020967 | 0.159199 | 12.69463 | 6.33E-37 | 9.78E-35 |
| 70 | ENSMUSG0 Nyap1     | 16.21473 | 2.019229 | 0.493901 | 4.08833  | 4.34E-05 | 0.000295 |
| 71 | ENSMUSG0 Pcyt1b    | 9.411286 | 2.008991 | 0.658176 | 3.052363 | 0.00227  | 0.009505 |
| 72 | ENSMUSG0 Wfdc21    | 6.283107 | 2.000632 | 0.758341 | 2.638169 | 0.008335 | 0.028859 |
| 73 | ENSMUSG0 Gtsf1     | 10.41929 | 1.987218 | 0.58665  | 3.387403 | 0.000706 | 0.003468 |
| 74 | ENSMUSG0 Gm21057   | 5.221055 | 1.985052 | 0.813624 | 2.439767 | 0.014697 | 0.046277 |
| 75 | ENSMUSG0 Cnr2      | 89.87708 | 1.979476 | 0.227391 | 8.705174 | 3.17E-18 | 1.55E-16 |
| 76 | ENSMUSG0 Nlrp3     | 23.04709 | 1.974645 | 0.399031 | 4.948595 | 7.48E-07 | 7.46E-06 |
| 77 | ENSMUSG0 Ms4a4c    | 7.3416   | 1.97198  | 0.762581 | 2.585928 | 0.009712 | 0.032879 |
| 78 | ENSMUSG0 Gm7609    | 68.0986  | 1.963623 | 0.24451  | 8.030864 | 9.68E-16 | 3.71E-14 |
| 79 | ENSMUSG0 Cd86      | 117.3885 | 1.953422 | 0.184522 | 10.58637 | 3.45E-26 | 3.04E-24 |
| 80 | ENSMUSG0 Slc14a1   | 6.166205 | 1.949533 | 0.771977 | 2.525379 | 0.011557 | 0.038011 |
| 81 | ENSMUSG0 Rasgrp3   | 33.60038 | 1.934277 | 0.320628 | 6.032784 | 1.61E-09 | 2.70E-08 |
| 82 | ENSMUSG0 Cyp4f18   | 39.31278 | 1.933017 | 0.325209 | 5.943918 | 2.78E-09 | 4.46E-08 |
| 83 | ENSMUSG0 Trim63    | 72.48161 | 1.931933 | 0.260299 | 7.421983 | 1.15E-13 | 3.45E-12 |
| 84 | ENSMUSG0 Nxph4     | 6.102616 | 1.930849 | 0.762447 | 2.532436 | 0.011327 | 0.037375 |
| 85 | ENSMUSG0 Neurl3    | 235.1606 | 1.925088 | 0.14267  | 13.49324 | 1.71E-41 | 3.63E-39 |
| 86 | ENSMUSG0 2010300C1 | 41.28568 | 1.893199 | 0.291375 | 6.49746  | 8.17E-11 | 1.67E-09 |
| 87 | ENSMUSG0 Ahnak2    | 9.783378 | 1.871128 | 0.629975 | 2.97016  | 0.002976 | 0.012004 |
| 88 | ENSMUSG0 Ptpn22    | 23.02741 | 1.849408 | 0.416046 | 4.445205 | 8.78E-06 | 7.00E-05 |
| 89 | ENSMUSG0 Sema4g    | 978.9736 | 1.845039 | 0.094506 | 19.52298 | 7.00E-85 | 9.83E-82 |
| 90 | ENSMUSG0 Fut1      | 6.761237 | 1.841411 | 0.742159 | 2.481154 | 0.013096 | 0.042155 |
| 91 | ENSMUSG0 St14      | 11.3962  | 1.833573 | 0.581366 | 3.153902 | 0.001611 | 0.007068 |
| 92 | ENSMUSG0 Enpp6     | 6.643263 | 1.832549 | 0.732042 | 2.503337 | 0.012303 | 0.040096 |
| 93 | ENSMUSG0 Themis2   | 416.5035 | 1.831056 | 0.107841 | 16.97916 | 1.17E-64 | 6.96E-62 |
| 94 | ENSMUSG0 Camkk1    | 26.781   | 1.828604 | 0.365693 | 5.000379 | 5.72E-07 | 5.84E-06 |
| 95 | ENSMUSG0 Csprs     | 72.80885 | 1.827022 | 0.241576 | 7.562932 | 3.94E-14 | 1.25E-12 |

|     |                    |          |          |          |          |          |          |
|-----|--------------------|----------|----------|----------|----------|----------|----------|
| 96  | ENSMUSG0 F11r      | 21.13896 | 1.826325 | 0.404367 | 4.516508 | 6.29E-06 | 5.16E-05 |
| 97  | ENSMUSG0 Tead2     | 40.54313 | 1.815764 | 0.291034 | 6.239011 | 4.40E-10 | 8.03E-09 |
| 98  | ENSMUSG0 AW112010  | 9.390625 | 1.815088 | 0.598237 | 3.034061 | 0.002413 | 0.010001 |
| 99  | ENSMUSG0 Slc47a2   | 17.57736 | 1.794021 | 0.447618 | 4.007932 | 6.13E-05 | 0.000402 |
| 100 | ENSMUSG0 Bspry     | 220.5556 | 1.789914 | 0.157798 | 11.34306 | 8.03E-30 | 9.26E-28 |
| 101 | ENSMUSG0 Pla2g4d   | 10.17979 | 1.786561 | 0.570612 | 3.130957 | 0.001742 | 0.00755  |
| 102 | ENSMUSG0 Grk1      | 7.461792 | 1.785437 | 0.659339 | 2.707919 | 0.006771 | 0.0241   |
| 103 | ENSMUSG0 Sla       | 614.4801 | 1.784031 | 0.086674 | 20.58334 | 3.87E-94 | 8.54E-91 |
| 104 | ENSMUSG0 Cd52      | 470.7387 | 1.781606 | 0.105781 | 16.8424  | 1.19E-63 | 6.36E-61 |
| 105 | ENSMUSG0 Nupr1     | 11.2089  | 1.779505 | 0.547111 | 3.252548 | 0.001144 | 0.005263 |
| 106 | ENSMUSG0 B3gnt5    | 208.2075 | 1.773141 | 0.136502 | 12.98986 | 1.40E-38 | 2.45E-36 |
| 107 | ENSMUSG0 Adamtsl4  | 81.57603 | 1.754851 | 0.221216 | 7.932754 | 2.14E-15 | 7.92E-14 |
| 108 | ENSMUSG0 Il12rb1   | 16.18958 | 1.752354 | 0.456421 | 3.839333 | 0.000123 | 0.000739 |
| 109 | ENSMUSG0 Tmem26    | 46.29309 | 1.746885 | 0.267558 | 6.528988 | 6.62E-11 | 1.38E-09 |
| 110 | ENSMUSG0 Rab30     | 18.90502 | 1.74082  | 0.403133 | 4.318231 | 1.57E-05 | 0.000119 |
| 111 | ENSMUSG0 Cdkn1a    | 90.67472 | 1.734418 | 0.198641 | 8.731402 | 2.52E-18 | 1.25E-16 |
| 112 | ENSMUSG0 Cd55os    | 59.08427 | 1.716914 | 0.272935 | 6.290554 | 3.16E-10 | 5.87E-09 |
| 113 | ENSMUSG0 LOC100503 | 22.09284 | 1.713523 | 0.399107 | 4.293394 | 1.76E-05 | 0.000132 |
| 114 | ENSMUSG0 Rbpms     | 9.702549 | 1.708399 | 0.577776 | 2.956854 | 0.003108 | 0.012432 |
| 115 | ENSMUSG0 17000300  | 7.025566 | 1.706329 | 0.656783 | 2.598012 | 0.009377 | 0.031926 |
| 116 | ENSMUSG0 Acsbg1    | 22.0167  | 1.701991 | 0.382056 | 4.454823 | 8.40E-06 | 6.73E-05 |
| 117 | ENSMUSG0 Zfyve28   | 60.68062 | 1.699307 | 0.294399 | 5.772126 | 7.83E-09 | 1.16E-07 |
| 118 | ENSMUSG0 Acvrl1    | 12.40004 | 1.699234 | 0.51354  | 3.308862 | 0.000937 | 0.004408 |
| 119 | ENSMUSG0 Pld4      | 999.4768 | 1.693495 | 0.081516 | 20.77505 | 7.28E-96 | 2.25E-92 |
| 120 | ENSMUSG0 Lsr       | 13.1403  | 1.687332 | 0.492604 | 3.42533  | 0.000614 | 0.003069 |
| 121 | ENSMUSG0 Rcn3      | 13.79721 | 1.676988 | 0.489313 | 3.427228 | 0.00061  | 0.003053 |
| 122 | ENSMUSG0 Csf2rb    | 143.6138 | 1.675842 | 0.15446  | 10.84966 | 2.00E-27 | 1.93E-25 |
| 123 | ENSMUSG0 Igsf9     | 115.1402 | 1.67269  | 0.176888 | 9.456204 | 3.19E-21 | 1.98E-19 |
| 124 | ENSMUSG0 Pik3r6    | 39.20588 | 1.665669 | 0.322367 | 5.166995 | 2.38E-07 | 2.61E-06 |
| 125 | ENSMUSG0 Efcab12   | 35.32207 | 1.659262 | 0.320232 | 5.181438 | 2.20E-07 | 2.44E-06 |
| 126 | ENSMUSG0 Soccs3    | 10.16571 | 1.654094 | 0.579476 | 2.854464 | 0.004311 | 0.016423 |
| 127 | ENSMUSG0 Slc16a12  | 8.549414 | 1.653497 | 0.609046 | 2.714895 | 0.00663  | 0.023713 |
| 128 | ENSMUSG0 Marveld3  | 14.37793 | 1.652644 | 0.492594 | 3.354981 | 0.000794 | 0.00383  |
| 129 | ENSMUSG0 F7303110  | 112.3526 | 1.639679 | 0.199218 | 8.230592 | 1.86E-16 | 7.76E-15 |
| 130 | ENSMUSG0 Il33      | 6.723131 | 1.632071 | 0.666316 | 2.449396 | 0.01431  | 0.04528  |
| 131 | ENSMUSG0 H1f5      | 10.96328 | 1.628234 | 0.547112 | 2.97605  | 0.00292  | 0.011808 |
| 132 | ENSMUSG0 Irgc1     | 22.51645 | 1.625416 | 0.392836 | 4.137643 | 3.51E-05 | 0.000244 |
| 133 | ENSMUSG0 Cdh23     | 26.9036  | 1.624847 | 0.332547 | 4.886066 | 1.03E-06 | 9.93E-06 |
| 134 | ENSMUSG0 Ly6d      | 324.1395 | 1.621666 | 0.119402 | 13.58157 | 5.15E-42 | 1.12E-39 |
| 135 | ENSMUSG0 Slc6a21   | 11.79435 | 1.615629 | 0.532573 | 3.03363  | 0.002416 | 0.010011 |
| 136 | ENSMUSG0 Pgm5      | 11.72806 | 1.612402 | 0.523571 | 3.079624 | 0.002073 | 0.008772 |
| 137 | ENSMUSG0 Tll2      | 11.71722 | 1.61182  | 0.527575 | 3.055147 | 0.00225  | 0.009433 |
| 138 | ENSMUSG0 Gm42372   | 18.99531 | 1.609228 | 0.418871 | 3.841823 | 0.000122 | 0.000733 |
| 139 | ENSMUSG0 Cyth4     | 138.3485 | 1.608301 | 0.15705  | 10.24068 | 1.30E-24 | 1.03E-22 |
| 140 | ENSMUSG0 Sema3g    | 74.74296 | 1.607726 | 0.211798 | 7.590847 | 3.18E-14 | 1.02E-12 |
| 141 | ENSMUSG0 Ly6m      | 13.16557 | 1.607618 | 0.513168 | 3.132732 | 0.001732 | 0.007515 |
| 142 | ENSMUSG0 Best1     | 15.04764 | 1.604495 | 0.446959 | 3.589804 | 0.000331 | 0.001783 |
| 143 | ENSMUSG0 Platr7    | 53.79501 | 1.604203 | 0.25037  | 6.407333 | 1.48E-10 | 2.90E-09 |

|     |                    |          |          |          |          |          |          |
|-----|--------------------|----------|----------|----------|----------|----------|----------|
| 144 | ENSMUSG0 Clec2f    | 9.179026 | 1.60232  | 0.575653 | 2.783484 | 0.005378 | 0.019877 |
| 145 | ENSMUSG0 Agbl1     | 22.267   | 1.594306 | 0.385175 | 4.139174 | 3.49E-05 | 0.000242 |
| 146 | ENSMUSG0 Cd80      | 44.39383 | 1.587922 | 0.281731 | 5.636312 | 1.74E-08 | 2.39E-07 |
| 147 | ENSMUSG0 Slc2a6    | 278.4217 | 1.583974 | 0.118249 | 13.3952  | 6.45E-41 | 1.29E-38 |
| 148 | ENSMUSG0 Gm8369    | 153.0265 | 1.583804 | 0.169097 | 9.366246 | 7.52E-21 | 4.48E-19 |
| 149 | ENSMUSG0 Rom1      | 62.27762 | 1.583395 | 0.222485 | 7.116877 | 1.10E-12 | 2.92E-11 |
| 150 | ENSMUSG0 Ncf1      | 48.00015 | 1.577695 | 0.281016 | 5.614253 | 1.97E-08 | 2.68E-07 |
| 151 | ENSMUSG0 Cdh5      | 44.08713 | 1.574959 | 0.269484 | 5.844347 | 5.09E-09 | 7.82E-08 |
| 152 | ENSMUSG0 Mr1       | 116.1621 | 1.569602 | 0.169155 | 9.279088 | 1.71E-20 | 9.93E-19 |
| 153 | ENSMUSG0 H2-Oa     | 37.95437 | 1.56033  | 0.298276 | 5.231155 | 1.68E-07 | 1.92E-06 |
| 154 | ENSMUSG0 Krt18     | 16.2692  | 1.555239 | 0.459321 | 3.385951 | 0.000709 | 0.003483 |
| 155 | ENSMUSG0 Tmem154   | 18.37366 | 1.54302  | 0.459104 | 3.360941 | 0.000777 | 0.003765 |
| 156 | ENSMUSG0 Hcst      | 22.53264 | 1.540498 | 0.371878 | 4.142477 | 3.44E-05 | 0.000239 |
| 157 | ENSMUSG0 Dennd3    | 451.3927 | 1.539305 | 0.109505 | 14.05689 | 6.99E-45 | 1.64E-42 |
| 158 | ENSMUSG0 Gm5431    | 12.69186 | 1.535938 | 0.559995 | 2.742772 | 0.006092 | 0.022144 |
| 159 | ENSMUSG0 Bmf       | 495.3138 | 1.535797 | 0.114311 | 13.43523 | 3.76E-41 | 7.64E-39 |
| 160 | ENSMUSG0 Ppp1r18   | 250.147  | 1.534034 | 0.112602 | 13.62345 | 2.91E-42 | 6.41E-40 |
| 161 | ENSMUSG0 Pmel      | 19.00695 | 1.532805 | 0.402094 | 3.812061 | 0.000138 | 0.000816 |
| 162 | ENSMUSG0 Slfn5     | 8.735052 | 1.528767 | 0.594775 | 2.570327 | 0.01016  | 0.034128 |
| 163 | ENSMUSG0 Cd180     | 97.39169 | 1.525293 | 0.185771 | 8.21063  | 2.20E-16 | 9.06E-15 |
| 164 | ENSMUSG0 Smpdl3a   | 83.31936 | 1.523432 | 0.187928 | 8.106451 | 5.21E-16 | 2.04E-14 |
| 165 | ENSMUSG0 Mcoln3    | 39.01913 | 1.520753 | 0.334929 | 4.540518 | 5.61E-06 | 4.66E-05 |
| 166 | ENSMUSG0 Prickle3  | 29.02424 | 1.517568 | 0.319264 | 4.753327 | 2.00E-06 | 1.83E-05 |
| 167 | ENSMUSG0 Tlr1      | 85.36959 | 1.517293 | 0.195393 | 7.765327 | 8.14E-15 | 2.82E-13 |
| 168 | ENSMUSG0 B430306N  | 10.9578  | 1.514932 | 0.511724 | 2.960447 | 0.003072 | 0.012312 |
| 169 | ENSMUSG0 Traf1     | 24.26959 | 1.512796 | 0.395896 | 3.821194 | 0.000133 | 0.000791 |
| 170 | ENSMUSG0 Adora2a   | 46.42444 | 1.511655 | 0.251416 | 6.012562 | 1.83E-09 | 3.03E-08 |
| 171 | ENSMUSG0 Exoc3l2   | 7.765601 | 1.506516 | 0.621453 | 2.424181 | 0.015343 | 0.04797  |
| 172 | ENSMUSG0 F5        | 27.15776 | 1.50004  | 0.338842 | 4.426966 | 9.56E-06 | 7.57E-05 |
| 173 | ENSMUSG0 Cd2       | 349.3926 | 1.49841  | 0.112773 | 13.28695 | 2.76E-40 | 5.46E-38 |
| 174 | ENSMUSG0 Clip2     | 190.0136 | 1.49762  | 0.146025 | 10.25591 | 1.11E-24 | 8.86E-23 |
| 175 | ENSMUSG0 Ddx43     | 11.54014 | 1.487869 | 0.507991 | 2.928925 | 0.003401 | 0.013442 |
| 176 | ENSMUSG0 Cpne5     | 18.65795 | 1.486219 | 0.441768 | 3.364252 | 0.000768 | 0.003723 |
| 177 | ENSMUSG0 Zfp36l1   | 287.1968 | 1.484666 | 0.152981 | 9.704892 | 2.87E-22 | 1.90E-20 |
| 178 | ENSMUSG0 Gm8995    | 2074.102 | 1.470709 | 0.089477 | 16.43682 | 1.04E-60 | 4.88E-58 |
| 179 | ENSMUSG0 Inpp4b    | 12.96819 | 1.463966 | 0.481525 | 3.040267 | 0.002364 | 0.009861 |
| 180 | ENSMUSG0 Kif9      | 40.85575 | 1.456147 | 0.317219 | 4.590346 | 4.43E-06 | 3.76E-05 |
| 181 | ENSMUSG0 Tgfb3     | 217.8609 | 1.455259 | 0.131307 | 11.08285 | 1.52E-28 | 1.58E-26 |
| 182 | ENSMUSG0 Tnfrsf13c | 269.0245 | 1.454748 | 0.12766  | 11.39548 | 4.40E-30 | 5.15E-28 |
| 183 | ENSMUSG0 Slc39a4   | 12.86786 | 1.453332 | 0.479175 | 3.032989 | 0.002421 | 0.010023 |
| 184 | ENSMUSG0 Cd74      | 5267.202 | 1.453309 | 0.077409 | 18.77442 | 1.22E-78 | 1.45E-75 |
| 185 | ENSMUSG0 Tle2      | 63.61186 | 1.447776 | 0.228039 | 6.348794 | 2.17E-10 | 4.17E-09 |
| 186 | ENSMUSG0 Pkd1l2    | 17.44565 | 1.445881 | 0.418869 | 3.451867 | 0.000557 | 0.002817 |
| 187 | ENSMUSG0 Rhof      | 179.8486 | 1.438682 | 0.146936 | 9.791199 | 1.23E-22 | 8.36E-21 |
| 188 | ENSMUSG0 Dkk1      | 11.21049 | 1.43712  | 0.527219 | 2.725853 | 0.006414 | 0.02312  |
| 189 | ENSMUSG0 Tlr12     | 69.19868 | 1.437011 | 0.207125 | 6.937905 | 3.98E-12 | 9.76E-11 |
| 190 | ENSMUSG0 Il21r     | 24.81725 | 1.434125 | 0.347449 | 4.12759  | 3.67E-05 | 0.000254 |
| 191 | ENSMUSG0 Scn8a     | 23.0981  | 1.433953 | 0.401159 | 3.574529 | 0.000351 | 0.001879 |

|     |                    |          |          |          |          |          |          |
|-----|--------------------|----------|----------|----------|----------|----------|----------|
| 192 | ENSMUSG0 Ifi47     | 97.4857  | 1.432924 | 0.173187 | 8.273847 | 1.30E-16 | 5.52E-15 |
| 193 | ENSMUSG0 Ddx4      | 14.85072 | 1.427994 | 0.450557 | 3.169396 | 0.001528 | 0.006735 |
| 194 | ENSMUSG0 Tg        | 30.01544 | 1.426635 | 0.315526 | 4.521452 | 6.14E-06 | 5.05E-05 |
| 195 | ENSMUSG0 Derl3     | 1010.209 | 1.424351 | 0.072519 | 19.64119 | 6.88E-86 | 1.06E-82 |
| 196 | ENSMUSG0 Snai3     | 88.10869 | 1.422967 | 0.182456 | 7.798969 | 6.24E-15 | 2.19E-13 |
| 197 | ENSMUSG0 Gm15326   | 25.22241 | 1.418775 | 0.34487  | 4.113942 | 3.89E-05 | 0.000268 |
| 198 | ENSMUSG0 C5ar2     | 10.47916 | 1.418054 | 0.516918 | 2.743288 | 0.006083 | 0.022124 |
| 199 | ENSMUSG0 Efna1     | 98.728   | 1.41795  | 0.17813  | 7.960212 | 1.72E-15 | 6.42E-14 |
| 200 | ENSMUSG0 LOC66478  | 48.42987 | 1.416314 | 0.262891 | 5.387447 | 7.15E-08 | 8.73E-07 |
| 201 | ENSMUSG0 9930111J2 | 378.4022 | 1.415947 | 0.1216   | 11.64433 | 2.45E-31 | 3.08E-29 |
| 202 | ENSMUSG0 Cmah      | 2035.815 | 1.410313 | 0.067866 | 20.78093 | 6.44E-96 | 2.25E-92 |
| 203 | ENSMUSG0 Sema7a    | 29.64744 | 1.405358 | 0.34886  | 4.02843  | 5.62E-05 | 0.000372 |
| 204 | ENSMUSG0 Fcamr     | 18.35525 | 1.399432 | 0.445724 | 3.139681 | 0.001691 | 0.00736  |
| 205 | ENSMUSG0 Cd40      | 113.9748 | 1.396596 | 0.167189 | 8.353377 | 6.63E-17 | 2.90E-15 |
| 206 | ENSMUSG0 Serpini1  | 66.43961 | 1.385726 | 0.213899 | 6.478423 | 9.27E-11 | 1.88E-09 |
| 207 | ENSMUSG0 Tsnaxip1  | 12.27939 | 1.375325 | 0.475629 | 2.891595 | 0.003833 | 0.014885 |
| 208 | ENSMUSG0 Itgam     | 42.03127 | 1.373659 | 0.261075 | 5.261557 | 1.43E-07 | 1.66E-06 |
| 209 | ENSMUSG0 Lifr      | 34.73979 | 1.37059  | 0.284253 | 4.821723 | 1.42E-06 | 1.34E-05 |
| 210 | ENSMUSG0 Cd55      | 597.528  | 1.364869 | 0.09613  | 14.19814 | 9.41E-46 | 2.38E-43 |
| 211 | ENSMUSG0 Pde4c     | 466.4674 | 1.361392 | 0.103061 | 13.20962 | 7.72E-40 | 1.45E-37 |
| 212 | ENSMUSG0 Scn4a     | 411.2152 | 1.361144 | 0.106162 | 12.82136 | 1.24E-37 | 2.07E-35 |
| 213 | ENSMUSG0 Cd69      | 28.79922 | 1.358744 | 0.3478   | 3.906678 | 9.36E-05 | 0.000581 |
| 214 | ENSMUSG0 Tmsb4x    | 4124.453 | 1.356033 | 0.06826  | 19.8658  | 8.05E-88 | 1.38E-84 |
| 215 | ENSMUSG0 Il10ra    | 548.5648 | 1.355321 | 0.08568  | 15.81847 | 2.32E-56 | 8.96E-54 |
| 216 | ENSMUSG0 Nlrc4     | 110.7375 | 1.353372 | 0.174942 | 7.736124 | 1.02E-14 | 3.50E-13 |
| 217 | ENSMUSG0 Itgb7     | 752.9709 | 1.343722 | 0.090751 | 14.80671 | 1.33E-49 | 3.86E-47 |
| 218 | ENSMUSG0 Lbh       | 541.9467 | 1.337388 | 0.103622 | 12.90644 | 4.14E-38 | 7.11E-36 |
| 219 | ENSMUSG0 Tm6sf1    | 81.34673 | 1.333635 | 0.244547 | 5.453504 | 4.94E-08 | 6.23E-07 |
| 220 | ENSMUSG0 Kcnb1     | 103.1943 | 1.333253 | 0.191396 | 6.965946 | 3.26E-12 | 8.14E-11 |
| 221 | ENSMUSG0 Gimap1    | 42.79084 | 1.323483 | 0.256146 | 5.166903 | 2.38E-07 | 2.61E-06 |
| 222 | ENSMUSG0 Tbc1d2    | 40.48526 | 1.315598 | 0.304427 | 4.321559 | 1.55E-05 | 0.000117 |
| 223 | ENSMUSG0 Cacnb4    | 57.39937 | 1.315116 | 0.223818 | 5.875822 | 4.21E-09 | 6.57E-08 |
| 224 | ENSMUSG0 Plgrkt    | 184.5935 | 1.31228  | 0.1465   | 8.95754  | 3.32E-19 | 1.76E-17 |
| 225 | ENSMUSG0 Bcl6      | 16.71516 | 1.310154 | 0.429748 | 3.048653 | 0.002299 | 0.00961  |
| 226 | ENSMUSG0 H2-DMa    | 54.8739  | 1.309018 | 0.254291 | 5.147715 | 2.64E-07 | 2.87E-06 |
| 227 | ENSMUSG0 Rhobtb1   | 60.67664 | 1.30771  | 0.230775 | 5.66661  | 1.46E-08 | 2.03E-07 |
| 228 | ENSMUSG0 Sp100     | 1554.32  | 1.307221 | 0.073276 | 17.83968 | 3.48E-71 | 2.98E-68 |
| 229 | ENSMUSG0 Cdh17     | 94.32627 | 1.306839 | 0.218486 | 5.981332 | 2.21E-09 | 3.61E-08 |
| 230 | ENSMUSG0 Lrrc36    | 14.64508 | 1.303798 | 0.455265 | 2.863822 | 0.004186 | 0.016028 |
| 231 | ENSMUSG0 Irak2     | 63.29934 | 1.301367 | 0.225586 | 5.768825 | 7.98E-09 | 1.18E-07 |
| 232 | ENSMUSG0 Ripor2    | 491.0354 | 1.300284 | 0.08598  | 15.12308 | 1.14E-51 | 3.75E-49 |
| 233 | ENSMUSG0 Naip1     | 62.5028  | 1.297627 | 0.256644 | 5.056135 | 4.28E-07 | 4.47E-06 |
| 234 | ENSMUSG0 Slc30a2   | 15.2056  | 1.294522 | 0.435164 | 2.97479  | 0.002932 | 0.011853 |
| 235 | ENSMUSG0 Trp53inp1 | 6067.378 | 1.291358 | 0.071097 | 18.16332 | 1.01E-73 | 9.15E-71 |
| 236 | ENSMUSG0 Lpp       | 61.78443 | 1.291216 | 0.229267 | 5.631925 | 1.78E-08 | 2.44E-07 |
| 237 | ENSMUSG0 9930111J2 | 207.7868 | 1.288776 | 0.150153 | 8.583102 | 9.23E-18 | 4.36E-16 |
| 238 | ENSMUSG0 Selenop   | 96.86017 | 1.2879   | 0.170366 | 7.559585 | 4.04E-14 | 1.28E-12 |
| 239 | ENSMUSG0 Trpv2     | 554.0313 | 1.286136 | 0.077343 | 16.6291  | 4.29E-62 | 2.07E-59 |

|     |                    |          |          |          |          |           |           |
|-----|--------------------|----------|----------|----------|----------|-----------|-----------|
| 240 | ENSMUSG0 Krt222    | 221.6291 | 1.283982 | 0.127771 | 10.0491  | 9.27E-24  | 6.79E-22  |
| 241 | ENSMUSG0 LOC10004: | 226.2227 | 1.283867 | 0.13567  | 9.463177 | 2.99E-21  | 1.87E-19  |
| 242 | ENSMUSG0 Tnnt1     | 26.72656 | 1.282611 | 0.349427 | 3.670616 | 0.000242  | 0.001347  |
| 243 | ENSMUSG0 Tle6      | 227.7369 | 1.280925 | 0.118567 | 10.80341 | 3.32E-27  | 3.14E-25  |
| 244 | ENSMUSG0 Endou     | 275.3744 | 1.280375 | 0.132384 | 9.671649 | 3.98E-22  | 2.58E-20  |
| 245 | ENSMUSG0 Dennd1c   | 161.1308 | 1.278128 | 0.151675 | 8.42678  | 3.55E-17  | 1.60E-15  |
| 246 | ENSMUSG0 Gm12504   | 22.60146 | 1.277606 | 0.349157 | 3.659112 | 0.000253  | 0.001399  |
| 247 | ENSMUSG0 Tns2      | 139.6982 | 1.277369 | 0.177867 | 7.181604 | 6.89E-13  | 1.88E-11  |
| 248 | ENSMUSG0 A530010L1 | 28.28124 | 1.274972 | 0.321212 | 3.969257 | 7.21E-05  | 0.000464  |
| 249 | ENSMUSG0 Bcar3     | 53.30243 | 1.272823 | 0.247831 | 5.135843 | 2.81E-07  | 3.04E-06  |
| 250 | ENSMUSG0 Bex6      | 13.692   | 1.272262 | 0.48136  | 2.643056 | 0.008216  | 0.028477  |
| 251 | ENSMUSG0 Myo5c     | 21.91012 | 1.268131 | 0.358691 | 3.535445 | 0.000407  | 0.002134  |
| 252 | ENSMUSG0 Gm32200   | 65.83286 | 1.264904 | 0.209938 | 6.025141 | 1.69E-09  | 2.82E-08  |
| 253 | ENSMUSG0 Tyrobp    | 42.037   | 1.263266 | 0.262596 | 4.810677 | 1.50E-06  | 1.41E-05  |
| 254 | ENSMUSG0 Hivep3    | 23.70648 | 1.261827 | 0.362751 | 3.47849  | 0.000504  | 0.002584  |
| 255 | ENSMUSG0 Evi2a     | 76.52398 | 1.261229 | 0.204894 | 6.155523 | 7.48E-10  | 1.31E-08  |
| 256 | ENSMUSG0 Cd37      | 2859.443 | 1.257343 | 0.059207 | 21.23655 | 4.39E-100 | 3.39E-96  |
| 257 | ENSMUSG0 Phf11b    | 55.38717 | 1.250604 | 0.221367 | 5.649473 | 1.61E-08  | 2.23E-07  |
| 258 | ENSMUSG0 4930558J1 | 84.2195  | 1.249125 | 0.191199 | 6.533124 | 6.44E-11  | 1.35E-09  |
| 259 | ENSMUSG0 Dlg4      | 25.66292 | 1.243432 | 0.326005 | 3.814146 | 0.000137  | 0.000809  |
| 260 | ENSMUSG0 Aig1      | 40.9368  | 1.241099 | 0.260588 | 4.762685 | 1.91E-06  | 1.75E-05  |
| 261 | ENSMUSG0 H2-Eb2    | 518.413  | 1.239497 | 0.096775 | 12.80801 | 1.48E-37  | 2.43E-35  |
| 262 | ENSMUSG0 Myadm     | 240.6888 | 1.236787 | 0.116099 | 10.65287 | 1.69E-26  | 1.53E-24  |
| 263 | ENSMUSG0 Carns1    | 77.56664 | 1.23449  | 0.189482 | 6.515073 | 7.27E-11  | 1.50E-09  |
| 264 | ENSMUSG0 Aox2      | 86.09051 | 1.233874 | 0.195756 | 6.303109 | 2.92E-10  | 5.45E-09  |
| 265 | ENSMUSG0 H4c12     | 26.16691 | 1.233603 | 0.330203 | 3.735897 | 0.000187  | 0.001076  |
| 266 | ENSMUSG0 Fam214b   | 36.95732 | 1.23346  | 0.27996  | 4.405851 | 1.05E-05  | 8.28E-05  |
| 267 | ENSMUSG0 E230029CC | 29.38134 | 1.233144 | 0.317952 | 3.878398 | 0.000105  | 0.000644  |
| 268 | ENSMUSG0 Nlrp10    | 76.71124 | 1.231765 | 0.233744 | 5.269721 | 1.37E-07  | 1.60E-06  |
| 269 | ENSMUSG0 S1pr1     | 1593.149 | 1.231414 | 0.055956 | 22.00699 | 2.47E-107 | 3.81E-103 |
| 270 | ENSMUSG0 Glipr1    | 13.8268  | 1.228366 | 0.498835 | 2.462468 | 0.013798  | 0.044014  |
| 271 | ENSMUSG0 Syt11     | 89.19655 | 1.22737  | 0.193655 | 6.337922 | 2.33E-10  | 4.44E-09  |
| 272 | ENSMUSG0 Bank1     | 350.6214 | 1.221037 | 0.107305 | 11.37914 | 5.31E-30  | 6.17E-28  |
| 273 | ENSMUSG0 Upb1      | 98.41571 | 1.220272 | 0.18534  | 6.583977 | 4.58E-11  | 9.79E-10  |
| 274 | ENSMUSG0 H2-Eb1    | 736.8227 | 1.21717  | 0.07971  | 15.27    | 1.21E-52  | 4.16E-50  |
| 275 | ENSMUSG0 Hpgds     | 13.27074 | 1.215444 | 0.455788 | 2.666687 | 0.00766   | 0.026828  |
| 276 | ENSMUSG0 Tlr6      | 72.79888 | 1.210058 | 0.20231  | 5.981212 | 2.21E-09  | 3.61E-08  |
| 277 | ENSMUSG0 Rdh12     | 80.07951 | 1.209475 | 0.195871 | 6.174862 | 6.62E-10  | 1.17E-08  |
| 278 | ENSMUSG0 Lgr5      | 235.4186 | 1.206032 | 0.123733 | 9.747024 | 1.90E-22  | 1.27E-20  |
| 279 | ENSMUSG0 Adam6b    | 30.09624 | 1.204346 | 0.316993 | 3.799287 | 0.000145  | 0.000854  |
| 280 | ENSMUSG0 4632428CC | 21.66195 | 1.200401 | 0.346033 | 3.469034 | 0.000522  | 0.002664  |
| 281 | ENSMUSG0 Lat2      | 116.0359 | 1.199987 | 0.161925 | 7.410746 | 1.26E-13  | 3.74E-12  |
| 282 | ENSMUSG0 Sifn8     | 75.89051 | 1.19833  | 0.207125 | 5.785526 | 7.23E-09  | 1.08E-07  |
| 283 | ENSMUSG0 Naip6     | 60.08256 | 1.198262 | 0.227962 | 5.25641  | 1.47E-07  | 1.70E-06  |
| 284 | ENSMUSG0 Parvb     | 89.2613  | 1.196736 | 0.182246 | 6.5666   | 5.15E-11  | 1.09E-09  |
| 285 | ENSMUSG0 Clec2g    | 28.32072 | 1.195072 | 0.353144 | 3.384095 | 0.000714  | 0.003499  |
| 286 | ENSMUSG0 Mag       | 57.61652 | 1.194626 | 0.216623 | 5.51476  | 3.49E-08  | 4.55E-07  |
| 287 | ENSMUSG0 Nmrk1     | 90.02554 | 1.192359 | 0.189702 | 6.28543  | 3.27E-10  | 6.04E-09  |



|     |                    |          |          |          |          |          |          |
|-----|--------------------|----------|----------|----------|----------|----------|----------|
| 288 | ENSMUSG0 Fam169b   | 223.0298 | 1.189595 | 0.114487 | 10.39065 | 2.73E-25 | 2.26E-23 |
| 289 | ENSMUSG0 Cd53      | 1964.478 | 1.185577 | 0.057404 | 20.65307 | 9.16E-95 | 2.36E-91 |
| 290 | ENSMUSG0 Atp6v0a1  | 274.9563 | 1.184522 | 0.122224 | 9.691437 | 3.28E-22 | 2.16E-20 |
| 291 | ENSMUSG0 Dmpk      | 13.60349 | 1.181153 | 0.454208 | 2.60047  | 0.00931  | 0.031733 |
| 292 | ENSMUSG0 Ms4a6b    | 27.07264 | 1.180771 | 0.344757 | 3.424936 | 0.000615 | 0.003071 |
| 293 | ENSMUSG0 F930017D: | 16.16379 | 1.179839 | 0.430325 | 2.741737 | 0.006112 | 0.022204 |
| 294 | ENSMUSG0 Lynx1     | 20.2255  | 1.176762 | 0.366446 | 3.211284 | 0.001321 | 0.005958 |
| 295 | ENSMUSG0 Amdhd1    | 26.39501 | 1.1745   | 0.331443 | 3.543594 | 0.000395 | 0.002081 |
| 296 | ENSMUSG0 Btg1      | 1061.668 | 1.168495 | 0.069354 | 16.84819 | 1.08E-63 | 5.97E-61 |
| 297 | ENSMUSG0 2810029C: | 16.14902 | 1.167863 | 0.404538 | 2.886904 | 0.003891 | 0.015059 |
| 298 | ENSMUSG0 Acp5      | 108.2271 | 1.163645 | 0.172803 | 6.733925 | 1.65E-11 | 3.72E-10 |
| 299 | ENSMUSG0 Notum     | 20.55312 | 1.160839 | 0.387178 | 2.998205 | 0.002716 | 0.011084 |
| 300 | ENSMUSG0 Zfp831    | 29.45071 | 1.160728 | 0.348325 | 3.332308 | 0.000861 | 0.004101 |
| 301 | ENSMUSG0 Tec       | 383.8572 | 1.159144 | 0.10326  | 11.22547 | 3.06E-29 | 3.40E-27 |
| 302 | ENSMUSG0 3300005D: | 19.21805 | 1.154629 | 0.45014  | 2.565042 | 0.010316 | 0.034524 |
| 303 | ENSMUSG0 Slc26a11  | 100.8808 | 1.151821 | 0.188261 | 6.118217 | 9.46E-10 | 1.64E-08 |
| 304 | ENSMUSG0 Cc2d2b    | 28.48558 | 1.149318 | 0.32591  | 3.52649  | 0.000421 | 0.002201 |
| 305 | ENSMUSG0 Stac2     | 149.0468 | 1.143649 | 0.147646 | 7.745876 | 9.49E-15 | 3.27E-13 |
| 306 | ENSMUSG0 Pald1     | 38.89078 | 1.140748 | 0.278543 | 4.095417 | 4.21E-05 | 0.000288 |
| 307 | ENSMUSG0 Nectin4   | 38.15887 | 1.140266 | 0.297627 | 3.831189 | 0.000128 | 0.000762 |
| 308 | ENSMUSG0 Slfn2     | 16.44919 | 1.139872 | 0.429137 | 2.656196 | 0.007903 | 0.027564 |
| 309 | ENSMUSG0 Ap3m2     | 41.69642 | 1.13933  | 0.274713 | 4.147342 | 3.36E-05 | 0.000234 |
| 310 | ENSMUSG0 Phyhd1    | 27.34193 | 1.139255 | 0.340515 | 3.345686 | 0.000821 | 0.003944 |
| 311 | ENSMUSG0 Padi3     | 28.45397 | 1.138872 | 0.309594 | 3.678593 | 0.000235 | 0.00131  |
| 312 | ENSMUSG0 Pml       | 2331.696 | 1.13026  | 0.056848 | 19.88197 | 5.83E-88 | 1.13E-84 |
| 313 | ENSMUSG0 Gask1a    | 15.12369 | 1.123873 | 0.435681 | 2.579577 | 0.009892 | 0.033336 |
| 314 | ENSMUSG0 Syndig1l  | 83.66842 | 1.123514 | 0.194203 | 5.785264 | 7.24E-09 | 1.08E-07 |
| 315 | ENSMUSG0 Slpi      | 172.9566 | 1.123147 | 0.132388 | 8.483734 | 2.18E-17 | 1.00E-15 |
| 316 | ENSMUSG0 Klf3      | 310.26   | 1.122204 | 0.101139 | 11.09562 | 1.32E-28 | 1.38E-26 |
| 317 | ENSMUSG0 Kifc2     | 43.60938 | 1.12178  | 0.251219 | 4.465339 | 7.99E-06 | 6.44E-05 |
| 318 | ENSMUSG0 Krt80     | 27.67969 | 1.121713 | 0.314989 | 3.561122 | 0.000369 | 0.001964 |
| 319 | ENSMUSG0 Entpd1    | 142.6047 | 1.120323 | 0.15608  | 7.177898 | 7.08E-13 | 1.92E-11 |
| 320 | ENSMUSG0 Hesx1     | 66.44633 | 1.116336 | 0.195959 | 5.696796 | 1.22E-08 | 1.74E-07 |
| 321 | ENSMUSG0 Card11    | 1706.893 | 1.116291 | 0.063962 | 17.45235 | 3.30E-68 | 2.22E-65 |
| 322 | ENSMUSG0 Ifi27     | 31.23467 | 1.115961 | 0.300765 | 3.710405 | 0.000207 | 0.001174 |
| 323 | ENSMUSG0 Ppfia3    | 28.10429 | 1.113802 | 0.312378 | 3.565561 | 0.000363 | 0.001933 |
| 324 | ENSMUSG0 Bfsp2     | 14.26301 | 1.112041 | 0.429615 | 2.588459 | 0.009641 | 0.032684 |
| 325 | ENSMUSG0 Soat1     | 57.57336 | 1.110584 | 0.217939 | 5.095852 | 3.47E-07 | 3.70E-06 |
| 326 | ENSMUSG0 Aqp3      | 22.41859 | 1.110463 | 0.359286 | 3.090748 | 0.001997 | 0.008494 |
| 327 | ENSMUSG0 Rab25     | 45.31445 | 1.106099 | 0.284593 | 3.886599 | 0.000102 | 0.000625 |
| 328 | ENSMUSG0 Cyp4f16   | 125.834  | 1.104197 | 0.161473 | 6.838265 | 8.02E-12 | 1.88E-10 |
| 329 | ENSMUSG0 Pipox     | 85.07243 | 1.101683 | 0.184252 | 5.979205 | 2.24E-09 | 3.65E-08 |
| 330 | ENSMUSG0 Lgals3    | 75.12715 | 1.101005 | 0.195794 | 5.623295 | 1.87E-08 | 2.55E-07 |
| 331 | ENSMUSG0 Plek      | 55.2871  | 1.10041  | 0.230092 | 4.782475 | 1.73E-06 | 1.60E-05 |
| 332 | ENSMUSG0 Lgals4    | 70.45481 | 1.099363 | 0.200666 | 5.478563 | 4.29E-08 | 5.48E-07 |
| 333 | ENSMUSG0 5830418P: | 52.75513 | 1.097291 | 0.228825 | 4.795323 | 1.62E-06 | 1.51E-05 |
| 334 | ENSMUSG0 Pdlim2    | 81.91844 | 1.093127 | 0.188395 | 5.802311 | 6.54E-09 | 9.86E-08 |
| 335 | ENSMUSG0 Tmem173   | 924.6953 | 1.091515 | 0.064998 | 16.79295 | 2.75E-63 | 1.42E-60 |

|     |                   |          |          |          |          |          |          |
|-----|-------------------|----------|----------|----------|----------|----------|----------|
| 336 | ENSMUSG0 Etv5     | 131.8344 | 1.08981  | 0.16447  | 6.626209 | 3.44E-11 | 7.46E-10 |
| 337 | ENSMUSG0 Chac1    | 109.0209 | 1.08823  | 0.183414 | 5.933182 | 2.97E-09 | 4.75E-08 |
| 338 | ENSMUSG0 Slc28a2  | 251.0782 | 1.087112 | 0.108311 | 10.03697 | 1.05E-23 | 7.60E-22 |
| 339 | ENSMUSG0 Hip1     | 274.049  | 1.081232 | 0.154442 | 7.000907 | 2.54E-12 | 6.44E-11 |
| 340 | ENSMUSG0 Stoml1   | 506.6482 | 1.080938 | 0.08753  | 12.34934 | 4.91E-35 | 7.09E-33 |
| 341 | ENSMUSG0 H2-T-ps  | 28.23507 | 1.079838 | 0.327816 | 3.294036 | 0.000988 | 0.00462  |
| 342 | ENSMUSG0 Ai427809 | 30.27028 | 1.078802 | 0.314563 | 3.429527 | 0.000605 | 0.003033 |
| 343 | ENSMUSG0 Arl4d    | 20.21224 | 1.078484 | 0.364194 | 2.961285 | 0.003064 | 0.01229  |
| 344 | ENSMUSG0 Thy1     | 27.52505 | 1.078357 | 0.324374 | 3.32442  | 0.000886 | 0.004201 |
| 345 | ENSMUSG0 Ifit2    | 38.86153 | 1.0782   | 0.278467 | 3.871915 | 0.000108 | 0.000657 |
| 346 | ENSMUSG0 Gbp9     | 20.72904 | 1.075664 | 0.354373 | 3.035397 | 0.002402 | 0.009981 |
| 347 | ENSMUSG0 Sit1     | 13.48259 | 1.074165 | 0.4382   | 2.451311 | 0.014234 | 0.045122 |
| 348 | ENSMUSG0 Arid5a   | 634.5308 | 1.072505 | 0.072152 | 14.86456 | 5.60E-50 | 1.70E-47 |
| 349 | ENSMUSG0 Tcn2     | 17.02016 | 1.071371 | 0.394397 | 2.716481 | 0.006598 | 0.02361  |
| 350 | ENSMUSG0 Mgarp    | 335.8013 | 1.066672 | 0.11846  | 9.004495 | 2.17E-19 | 1.17E-17 |
| 351 | ENSMUSG0 Tmem38a  | 34.67334 | 1.064762 | 0.267863 | 3.975025 | 7.04E-05 | 0.000454 |
| 352 | ENSMUSG0 Snord83b | 23.46949 | 1.064149 | 0.397269 | 2.678662 | 0.007392 | 0.026028 |
| 353 | ENSMUSG0 Ms4a6c   | 45.94    | 1.063374 | 0.25358  | 4.193445 | 2.75E-05 | 0.000196 |
| 354 | ENSMUSG0 Tjp3     | 24.26428 | 1.062905 | 0.324548 | 3.275035 | 0.001056 | 0.004903 |
| 355 | ENSMUSG0 Vsir     | 393.3515 | 1.06167  | 0.105114 | 10.1002  | 5.51E-24 | 4.09E-22 |
| 356 | ENSMUSG0 Fmnl3    | 274.5999 | 1.060602 | 0.101603 | 10.43867 | 1.65E-25 | 1.39E-23 |
| 357 | ENSMUSG0 Blk      | 281.0954 | 1.056644 | 0.10706  | 9.869635 | 5.64E-23 | 3.92E-21 |
| 358 | ENSMUSG0 Fcmlr    | 94.53839 | 1.05352  | 0.170761 | 6.169548 | 6.85E-10 | 1.20E-08 |
| 359 | ENSMUSG0 Enpp4    | 47.3828  | 1.052723 | 0.236367 | 4.453767 | 8.44E-06 | 6.75E-05 |
| 360 | ENSMUSG0 Gm9828   | 44.19211 | 1.051769 | 0.25521  | 4.121186 | 3.77E-05 | 0.00026  |
| 361 | ENSMUSG0 Glipr2   | 92.71889 | 1.047123 | 0.189134 | 5.536421 | 3.09E-08 | 4.07E-07 |
| 362 | ENSMUSG0 5830428M | 191.2763 | 1.045952 | 0.142458 | 7.342195 | 2.10E-13 | 6.08E-12 |
| 363 | ENSMUSG0 Acpp     | 33.05334 | 1.042306 | 0.295076 | 3.532325 | 0.000412 | 0.002159 |
| 364 | ENSMUSG0 Ccdc88b  | 860.6809 | 1.036101 | 0.077088 | 13.44058 | 3.50E-41 | 7.20E-39 |
| 365 | ENSMUSG0 Slc2a9   | 138.1539 | 1.036066 | 0.14373  | 7.20842  | 5.66E-13 | 1.56E-11 |
| 366 | ENSMUSG0 Arhgap4  | 282.6657 | 1.033023 | 0.136276 | 7.580384 | 3.45E-14 | 1.11E-12 |
| 367 | ENSMUSG0 Plcb2    | 156.6169 | 1.032605 | 0.140274 | 7.361349 | 1.82E-13 | 5.32E-12 |
| 368 | ENSMUSG0 Ublcp1   | 194.7319 | 1.031982 | 0.122301 | 8.438063 | 3.23E-17 | 1.46E-15 |
| 369 | ENSMUSG0 Parp3    | 66.33126 | 1.029845 | 0.195718 | 5.26189  | 1.43E-07 | 1.66E-06 |
| 370 | ENSMUSG0 Tsc22d3  | 285.2184 | 1.026658 | 0.096997 | 10.58443 | 3.52E-26 | 3.09E-24 |
| 371 | ENSMUSG0 Haa0     | 184.4094 | 1.02452  | 0.124869 | 8.204729 | 2.31E-16 | 9.47E-15 |
| 372 | ENSMUSG0 Fam83g   | 15.97213 | 1.024256 | 0.416906 | 2.456804 | 0.014018 | 0.044585 |
| 373 | ENSMUSG0 Icam1    | 286.4105 | 1.023729 | 0.103546 | 9.88672  | 4.75E-23 | 3.32E-21 |
| 374 | ENSMUSG0 Sag      | 21.91698 | 1.023405 | 0.341782 | 2.994319 | 0.002751 | 0.011205 |
| 375 | ENSMUSG0 Spns3    | 330.488  | 1.022066 | 0.100414 | 10.17847 | 2.47E-24 | 1.88E-22 |
| 376 | ENSMUSG0 Gm5127   | 16.61943 | 1.021524 | 0.416153 | 2.454683 | 0.014101 | 0.044812 |
| 377 | ENSMUSG0 Cacna1h  | 102.3082 | 1.021421 | 0.188969 | 5.405221 | 6.47E-08 | 7.97E-07 |
| 378 | ENSMUSG0 Fgf11    | 147.3249 | 1.020018 | 0.149114 | 6.840511 | 7.89E-12 | 1.86E-10 |
| 379 | ENSMUSG0 Scimp    | 18.93374 | 1.016098 | 0.361065 | 2.814165 | 0.00489  | 0.018283 |
| 380 | ENSMUSG0 M1ap     | 34.18682 | 1.01342  | 0.278727 | 3.635889 | 0.000277 | 0.001521 |
| 381 | ENSMUSG0 Mapk11   | 223.1388 | 1.008495 | 0.118952 | 8.478168 | 2.29E-17 | 1.05E-15 |
| 382 | ENSMUSG0 Plk2     | 830.9467 | 1.007248 | 0.086744 | 11.61173 | 3.59E-31 | 4.37E-29 |
| 383 | ENSMUSG0 Lgr6     | 30.51103 | 1.006422 | 0.320516 | 3.140002 | 0.001689 | 0.007354 |

|     |          |           |          |          |          |          |          |          |
|-----|----------|-----------|----------|----------|----------|----------|----------|----------|
| 384 | ENSMUSG0 | Tcp11l2   | 1258.256 | 1.004015 | 0.061435 | 16.34267 | 4.91E-60 | 2.17E-57 |
| 385 | ENSMUSG0 | Zswim5    | 16.56264 | -1.01472 | 0.345864 | -2.93388 | 0.003348 | 0.013267 |
| 386 | ENSMUSG0 | Itпка     | 35.59977 | -1.04103 | 0.273707 | -3.80343 | 0.000143 | 0.000842 |
| 387 | ENSMUSG0 | D630045J1 | 64.57395 | -1.05279 | 0.204171 | -5.15644 | 2.52E-07 | 2.74E-06 |
| 388 | ENSMUSG0 | Wdsub1    | 38.55246 | -1.08695 | 0.253351 | -4.29029 | 1.78E-05 | 0.000133 |
| 389 | ENSMUSG0 | Il17d     | 23.68499 | -1.09681 | 0.295392 | -3.71306 | 0.000205 | 0.001163 |
| 390 | ENSMUSG0 | Nkain1    | 28.09672 | -1.1367  | 0.278255 | -4.08508 | 4.41E-05 | 0.000299 |
| 391 | ENSMUSG0 | Gja3      | 10.93003 | -1.15728 | 0.460108 | -2.51524 | 0.011895 | 0.03897  |
| 392 | ENSMUSG0 | Tesmin    | 12.92368 | -1.18538 | 0.407447 | -2.90927 | 0.003623 | 0.014205 |
| 393 | ENSMUSG0 | Frmpd1    | 105.8248 | -1.22027 | 0.139833 | -8.72666 | 2.62E-18 | 1.30E-16 |
| 394 | ENSMUSG0 | Smoc1     | 112.04   | -1.22052 | 0.147661 | -8.2657  | 1.39E-16 | 5.88E-15 |
| 395 | ENSMUSG0 | Comtd1    | 27.53499 | -1.22999 | 0.270144 | -4.5531  | 5.29E-06 | 4.41E-05 |
| 396 | ENSMUSG0 | Slc16a3   | 71.73911 | -1.23922 | 0.513393 | -2.41378 | 0.015788 | 0.049024 |
| 397 | ENSMUSG0 | Endod1    | 23.26393 | -1.28145 | 0.304288 | -4.21129 | 2.54E-05 | 0.000183 |
| 398 | ENSMUSG0 | Tmem158   | 52.49718 | -1.29521 | 0.217944 | -5.94286 | 2.80E-09 | 4.49E-08 |
| 399 | ENSMUSG0 | Gpr63     | 27.6611  | -1.30508 | 0.294435 | -4.43249 | 9.32E-06 | 7.40E-05 |
| 400 | ENSMUSG0 | Ntn1      | 183.2865 | -1.31596 | 0.129102 | -10.1931 | 2.13E-24 | 1.66E-22 |
| 401 | ENSMUSG0 | Aatk      | 20.28717 | -1.31604 | 0.331304 | -3.97232 | 7.12E-05 | 0.000458 |
| 402 | ENSMUSG0 | Best3     | 22.20264 | -1.31972 | 0.295064 | -4.47268 | 7.72E-06 | 6.24E-05 |
| 403 | ENSMUSG0 | Adra2c    | 66.65057 | -1.32603 | 0.175594 | -7.55169 | 4.30E-14 | 1.35E-12 |
| 404 | ENSMUSG0 | Gab2      | 9.667921 | -1.32952 | 0.476612 | -2.78952 | 0.005279 | 0.019564 |
| 405 | ENSMUSG0 | Fbln1     | 8.045204 | -1.32976 | 0.51395  | -2.58733 | 0.009672 | 0.032777 |
| 406 | ENSMUSG0 | Tubb3     | 775.7411 | -1.47892 | 0.082995 | -17.8193 | 5.01E-71 | 4.07E-68 |
| 407 | ENSMUSG0 | Prkra     | 10.01019 | -1.54213 | 0.487671 | -3.16224 | 0.001566 | 0.006889 |
| 408 | ENSMUSG0 | Fzd4      | 9.025605 | -1.55041 | 0.498432 | -3.11058 | 0.001867 | 0.008012 |
| 409 | ENSMUSG0 | Ubap1l    | 6.493259 | -1.57236 | 0.633204 | -2.48319 | 0.013021 | 0.041959 |
| 410 | ENSMUSG0 | Prom1     | 76.86623 | -1.58013 | 0.189845 | -8.32325 | 8.56E-17 | 3.71E-15 |
| 411 | ENSMUSG0 | Clec2m    | 7.883032 | -1.63051 | 0.586825 | -2.77852 | 0.005461 | 0.020133 |
| 412 | ENSMUSG0 | Fsip2l    | 9.172377 | -1.72057 | 0.503384 | -3.41801 | 0.000631 | 0.003141 |
| 413 | ENSMUSG0 | Gp5       | 4.862595 | -1.72694 | 0.652636 | -2.6461  | 0.008143 | 0.028261 |
| 414 | ENSMUSG0 | Epb41l4b  | 9.304662 | -1.8496  | 0.54136  | -3.41659 | 0.000634 | 0.003153 |
| 415 | ENSMUSG0 | Vmn2r97   | 6.227493 | -1.91109 | 0.640684 | -2.9829  | 0.002855 | 0.011571 |
| 416 | ENSMUSG0 | Tal1      | 4.553817 | -2.3489  | 0.713934 | -3.29007 | 0.001002 | 0.00468  |
| 417 | ENSMUSG0 | Hrh3      | 5.436203 | -2.90581 | 0.69367  | -4.18903 | 2.80E-05 | 0.000199 |
